Expansion microscopy reveals *Plasmodium falciparum* blood-stage parasites undergo anaphase with a chromatin bridge in the absence of mini-chromosome maintenance complex binding protein.

Benjamin Liffner<sup>1</sup>, Sabrina Absalon<sup>1\*</sup>

<sup>1</sup>Department of Pharmacology and Toxicology, Indiana University School of Medicine, Indianapolis, IN, USA.

\* Corresponding author

E-mail: [Sabsalon@iu.edu](mailto:Sabsalon@iu.edu)

# ABSTRACT

Mitosis in the malaria parasite *Plasmodium falciparum* undergoes closed mitosis, which occurs within an intact nuclear envelope, and differs significantly from its human host. Mitosis is underpinned by the dynamics of microtubules and the nuclear envelope. To date, our ability to study *P. falciparum* mitosis by microscopy has been hindered by the small size of *P. falciparum* nuclei. Ultrastructure expansion microscopy (U-ExM) has recently been developed for *P. falciparum*, allowing visualization of mitosis at the individual nucleus level. Using U-ExM, three intranuclear microtubule structures are observed: hemispindles, mitotic spindles and interpolar spindles. A previous study demonstrated that the mini-chromosome maintenance complex binding-protein (MCMBP) depletion caused abnormal nuclear morphology and microtubule defects. To investigate the role of microtubules following MCMBP depletion and study the nuclear envelope in these parasites, we developed the first nuclear stain enabled by U-ExM in *P. falciparum*. MCMBP deficient parasites show aberrant hemispindles and mitotic spindles. Moreover, anaphase chromatin bridges, and individual nuclei containing multiple microtubule structures were observed following MCMBP knockdown. Collectively, this study refines our model for the phenotype of MCMBP-deficient parasites and highlights the utility of U-ExM coupled with a nuclear envelope stain for studying mitosis in *P. falciparum*.

## INTRODUCTION

Malaria is estimated cause over 400,000 deaths annually, these deaths are predominantly in young children and are caused by the unicellular protozoan pathogen *Plasmodium falciparum* [1]. Resistance against frontline antimalarials has emerged in many parts of the globe and is spreading [2-6]. Moreover, there is no highly effective vaccine against malaria, highlighting the need to develop new therapeutic interventions for ongoing and future control of this disease. One therapeutic strategy is drug inhibition of DNA/RNA replication, and/or cell division, a method that is commonly used for control of bacterial [7] and viral diseases [8], along with many types of cancer [9]. The distinctive division method of *P. falciparum* compared to its human host makes this an attractive strategy for *P. falciparum* drug design, yet no current antimalarials directly target DNA replication or cell division [10]; highlighting the need for further investigation into this pathway.

*Plasmodium* parasites undergo cell division by a process known as schizogony, whereby a singly nucleated parasite undergoes repeated rounds of DNA replication and mitosis, within a shared cytoplasm, followed by a single cytokinetic event that results in the formation of 16-32 daughter parasites [11-13]. Throughout division, *Plasmodium* undergoes closed mitosis, where the nuclear envelope remains intact, as opposed to the open mitosis of its human host [14]. Nuclear division during schizogony is orchestrated by a set of intranuclear microtubule structures, which appear to be unique to *Plasmodium* [15,16]. The first observed microtubule structure during the blood-stage of the lifecycle is the hemispindle, a collection of ~5 microtubule branches that extend from a single microtubule organizing center (MTOC) throughout the nucleus [15-17]. It has been shown that around when DNA replication begins, the hemispindle retracts, the MTOC duplicates, and the mitotic spindle is formed. Mitotic spindles consist of short microtubules that extend from two opposing MTOCs and connect to the kinetochore, in preparation for chromatid separation into daughter nuclei [15,16,18-21].

Following chromatid separation, two distinct and distant DNA masses are observed, each containing their own MTOC, but connected by extended microtubules that are attached to both MTOCs [16]. The nomenclature around this microtubule structure is inconsistent, but in this study, they will be referred to as interpolar spindles. Following nuclear segregation, the interpolar spindle retracts and the two daughter nuclei undergo nuclei fission before reforming the hemispindle [16].

Mitosis in *Plasmodium* has been poorly studied historically. This is due to the small size of *P. falciparum* nuclei (~1  $\mu\text{m}$  diameter), which largely prevents visualization of events occurring at a single-nucleus level by conventional microscopy techniques. Technological advancements that overcome the resolution hurdle, along with recent work on other organisms that undergo closed mitosis, have reignited interest in closed mitosis broadly and of *Plasmodium* mitosis specifically. The application of Ultrastructural-expansion microscopy (U-ExM), a sample preparation method that isotropically expands the sample ~4.5x, to *P. falciparum* [22] has radically enhanced our ability to study the biology occurring inside individual nuclei. Indeed U-ExM has already been used to observe microtubules in asexual blood-stages, ookinetes and gametocytes [16,22,23]. Moreover, U-ExM has been used to differentiate the intranuclear microtubules of *P. falciparum*, providing significance insight into the physiology of microtubule dynamics in the process [16,22]. Outside of *Plasmodium*, a recent study on the genetically tractable and much larger fission yeast that undergoes closed mitosis, *Schizosaccharomyces pombe*, provided mechanistic insight into this fascinating process, with a particular focus on the relationship between closed mitosis and nuclear envelope dynamics [24]. With the application of U-ExM to *P. falciparum*, we can now begin to study the closed mitosis of *Plasmodium* with a resolving power similar to fission yeast, the most well studied model organism for closed mitosis. Notably, however, the absence of a

uniform marker for the nuclear envelope in *Plasmodium* largely precludes understanding of the role of the nuclear envelope in closed mitosis.

Studies on *Plasmodium* microtubules historically have been largely descriptive and relatively few individual proteins are known to influence microtubule dynamics. One protein that has previously been shown to be involved in *P. falciparum* microtubule organization is the mini-chromosome maintenance binding protein (MCMBP) [25]. In other organisms, MCMBP is directly involved in DNA replication, with disruption or alteration in its expression leading to defects in DNA replication and nuclear morphology, and leading to MTOC amplification [26-28]. In a recent study, the authors generated a transgenic parasite line for inducible knockdown where the destabilization domain system was incorporated into MCMBP (MCMBP<sup>HADD</sup>). Using this system, the addition of a molecule called Shield-1 (Shld1) results in wildtype expression of MCMBP, while the absence of Shld1 results in specific MCMBP knockdown. MCMBP deficient parasites were able to undergo DNA replication, but showed severe microtubule defects and aneuploidy; attributed to defective DNA segregation [25]. Importantly, while this work was performed with state-of-the-art Airyscan microscopy at the time of publication, they were unable to visualize several important facets of mitosis and microtubules in MCMBP-deficient parasites due to the resolution limit of this techniques. Notably, the limited resolution meant it could not be determined whether aberrant microtubules represented hemispindles or interpolar spindles. Additionally, the absence of a nuclear envelope marker meant that it could not be determined whether microtubule structures were present in the shared, or separate, nuclei.

Here, we use U-ExM to study spatial organization of intranuclear microtubules and nuclear division in the context of MCMBP deficient parasites. Additionally, we develop the first U-ExM compatible nuclear envelope stain. We use U-ExM to show that MCMBP deficient parasites display defective hemispindles and mitotic spindles. Additionally, we couple U-ExM

and nuclear envelope staining to show that MCMBP deficient parasites form anaphase chromatin bridges, which leads to aneuploidy and the presence of multiple microtubule structures contained within the same nuclear envelope.

## METHODS

### *Plasmodium falciparum* culture

All parasites used in this study were the previously generated transgenic parasite line 3D7-PfMCMBP<sup>3HADD</sup> [25]. For routine culture parasites were grown in O<sup>+</sup> human red blood cells at hematocrit of 4% in RPMI-1640 supplemented with 50 mg/L hypoxanthine, 25 mM HEPES, 0.5% w/v Albumax II and incubated in a mixture of 1% O<sub>2</sub>, 5 % CO<sub>2</sub> and 94 % N<sub>2</sub> as previously described [29]. Additionally, to prevent degradation of MCMBP through the destabilization domain system, parasites were cultured in the presence of 250 nM Shield-1 as previously described [25,30].

Parasites were tightly synchronized using a combination of Percoll concentration and sorbitol lysis. Briefly, schizont-stage cultures were resuspended in 60 % Percoll and separated from uninfected red blood cells by centrifugation as previously described [31]. Concentrated schizonts were then allowed to reinvade new red blood cells for ~3 hours under normal culture conditions. Following reinvasion, parasite cultures were resuspended in 5% w/v D-sorbitol to selectively lyse schizonts that had not reinvaded, as previously described [32].

For assays requiring knockdown of MCMBP, and therefore washout of Shield-1, synchronized schizont-stage cultures (~44-46 h.p.i.) were separated from uninfected red blood cell using QuadroMACS<sup>®</sup> magnet activated cell sorting [33]. Parasites were allowed to reinvade in the absence of Shield-1 for ~3 hours before being synchronized with sorbitol. As it has been previously shown that knockdown of MCMBP delays parasite growth by

approximately three hours [25], parasites grown in the absence of Shield-1 were always collected three hours after those grown in the presence of Shield-1.

For assays where segmented schizonts were harvested, schizont-stage cultures (~44 h.p.i.) were treated with the schizont egress inhibitor [34] trans-Epoxy succinyl-L-leucylamido(4-guanidino)butane (E64) at 10  $\mu$ M for ~5 hours.

## **Immunofluorescence assays**

Immunofluorescence assays in this study were adapted from previously published protocols [17,25]. Briefly, for immunofluorescence assays of unexpanded parasites, ~1 mL of parasite culture at 2% hematocrit was centrifuged at 2,000 rpm in a benchtop centrifuge, the supernatant removed, and the culture resuspended in 4 % w/v paraformaldehyde-PBS before incubating at room temperature for 10 minutes. Fixed parasite cultures were again centrifuged at 2,000 rpm, with the fixative removed and ~3  $\mu$ L of packed red blood cell pellet smeared onto a glass slide and dried. Dried smears were washed three times in PBS before being permeabilized with 0.1 % v/v Triton-X-100 for 10 minutes at room temperature. Following permeabilization, smears were washed three times in PBS and blocked in 3 % w/v bovine serum albumin in PBS for 60 minutes at room temperature. After blocking, smears were incubated with primary antibodies diluted in blocking solution for one hour at room temperature, followed by three washes in PBS. Slides were then incubated with secondary antibodies and NHS ester diluted in PBS for one hour at room temperature. Following antibody staining, slides were washed three times in PBS, dried, mounted with ProLong™ Glass with NucBlue™ (ThermoFisher Cat. No. P36981) and a #1.5 coverslip placed on top of the smear.

## Ultrastructure Expansion Microscopy

Ultrastructure Expansion Microscopy (U-ExM) was performed as previously described [16,22,35], with significant modification.

12 mm round coverslips (Fisher Cat. No. NC1129240) were treated with poly-D-lysine for 1 hour at 37 °C, washed twice with MilliQ water, and placed in the wells of a 12-well plate. Parasite cultures were set to 0.5 % hematocrit, and 1 mL of parasite culture was allowed to settle onto the coverslip for 15 minutes at 37 °C. Culture supernatants were removed, and cultures were fixed with 1 mL of 4% w/v PFA/PBS for 15 minutes at 37 °C. Following fixation, coverslips were washed three times with PBS pre-warmed to 37 °C before being treated with 1 mL of 1.4 % v/v formaldehyde / 2% v/v acrylamide (FA/AA) in PBS. After addition of the FA/AA solution, the 12 well plate was parafilm sealed and left to incubate at 37 °C overnight.

Monomer solution (19 % w/w sodium acrylate (Sigma Cat. No. 408220), 10% v/v acrylamide (Sigma Cat. No. A4058), 2 % v/v N,N'-methylenebisacrylamide (Sigma Cat. No. M1533) in PBS) was made in 1 mL batches on Day 1 and stored as 90 µL aliquots at -20 °C overnight.

10 % v/v tetraethylenediamine (TEMED; ThermoFisher Cat. No. 17919) and 10 % w/v ammonium persulfate (APS; ThermoFisher Cat. No. 17874) aliquots were thawed on ice, while a humidity chamber containing parafilm was stored at -20 °C before also being placed on ice. FA/AA solution was removed, coverslips were washed once with PBS, dried, and placed cell-side up on the parafilm in the humidity chamber. 5 µL of both TEMED and APS were added per 90 µL of monomer solution, which was briefly vortexed, and 35 µL pipetted onto the parafilm before the coverslip was placed cell-side down onto the monomer solution. Gels were then incubated at 37 °C for 1 hour before being transferred into the wells of a 6-well plate filled with denaturation buffer for 15 minutes at room temperature (200 mM sodium dodecyl sulfate



(SDS), 200 mM NaCl, 50 mM Tris, pH 9). Gels were then separated from coverslips and transferred into Eppendorf tubes containing denaturation buffer and denatured at 95 °C for 90 minutes. Denatured gels were transferred into 10 cm Petri dishes filled with 25 mL MilliQ water and placed on platform shaker for 30 minutes, with the water replaced twice, each for a further 30 minutes. After the first expansion in water, expanded gels were shrunk by adding 25 mL two PBS washes each for 15 minutes. Shrunken gels were placed into the wells of a 6-well plate filled with blocking buffer (3% BSA-PBS) and blocked for 1 hour at room temperature on a platform shaker. After blocking, primary antibodies were prepared in 1 mL of blocking buffer and gels were incubated with primary antibody overnight at room temperature on a platform shaker.

Gels were washed three times in 0.5 % v/v PBS-Tween 20 (PBS-T), each for 10 minutes, before being incubated with 1 mL of secondary antibodies, NHS ester and/or nuclear stain diluted in PBS for 2.5 hours at room temperature on a platform shaker. Following secondary incubation, gels were washed three times in PBS-T. Stained gels were then transferred back to 10 cm Petri dishes and underwent a second round of expansion with three 30 minutes washes in 25 mL MilliQ water.

The diameter of fully expanded gels was measured using a tape measure and the expansion factor determined by dividing the expanded gel size (in mm) by the initial coverslip size (12mm). Gel diameter and expansion factor for all gels prepared in this study can be found Supplementary Figure 1.

For gels stained with BODIPY TR Ceramide (BODIPY TRc), sections of the expanded gel were cut and placed into the wells of a 6-well plate containing 1 mL 2  $\mu$ M BODIPY TRc in MilliQ and incubated on a platform shaker overnight.

To prepare gels for imaging, small sections were cut from the larger gel and gently dried before being placed into 35 mm #1.5 coverslip bottomed imaging dishes (Cellvis; Fisher Cat. No. NC0409658) that had been pre-coated with poly-D-lysine.

## Stains and antibodies

The following primary antibodies were used in this study: Mouse IgG1 anti-alpha Tubulin Clone B-5-1-2; ThermoFisher cat. No. 32-2500 (1:1000 unexpanded samples, 1:500 U-ExM samples), Mouse IgG2a anti-Centrin-1 Clone 20H5; EMD Millipore cat. No. 04-1624 (1:100 U-ExM samples), Rabbit polyclonal anti-PfBiP; generously provided by Dr. Jeff Dvorin (1:500 U-ExM samples).

The following secondary antibodies were used in this study: Goat anti-mouse IgG Alexa Fluor 488 Superclonal™; ThermoFisher Cat. No. A28175 (1:1000 unexpanded samples, 1:500 U-ExM samples), Goat anti-mouse IgG2a Alexa Fluor 488 Cross-Adsorbed; ThermoFisher Cat. No. A21131 (1:500 U-ExM samples), Goat anti-mouse IgG1 Alexa Fluor 594 Cross-Adsorbed; ThermoFisher Cat. No. A21125 (1:500 U-ExM samples), Goat anti-mouse IgG1 Alexa Fluor 647 Cross-Adsorbed; ThermoFisher Cat. No. A21240 (1:500 U-ExM samples), Goat anti-rabbit Alexa Fluor 488 Highly Cross-Adsorbed; ThermoFisher Cat. No. A11034 (1:500 U-ExM samples).

The following stains were used in this study: NucBlue™/Hoechst 33342 (in ProLong Glass™ mountant), DAPI (2 µg/mL U-ExM samples), NHS Ester Atto 594 in DMSO; Sigma Cat. No. 08741 (10 µg/mL unexpanded samples. 10 µg/mL U-ExM samples), NHS Ester Alexa Fluor 405 in DMSO; ThermoFisher Cat. No. A30000 (8 µg/mL U-ExM samples), DRAQ5™; ThermoFisher Cat. No. 62251 (20 µM U-ExM samples), SYTOX™ Deep Red; ThermoFisher Cat. No. S11381 (1 µM U-ExM samples), BODIPY TR Ceramide in DMSO; ThermoFisher Cat. No. D7540 (2 µM U-ExM samples).

A comprehensive list of all primary antibodies, secondary antibodies, and stains used for each of the images presented in this study can be found in Supplementary Table 1.

## **Image acquisition**

All microscopy presented in this study was performed on a Zeiss LSM800 AxioObserver microscope that had an Airyscan detector. Additionally, all images were acquired using a 63x Plan-Apochromat (NA 1.4) objective lens. All images presented in this study were acquired as Z-stacks with an XY pixel size of 0.035  $\mu\text{m}$  and a Z-step size of 0.15  $\mu\text{m}$ . All images then underwent Airyscan processing using ZEN Blue (Version 3.1).

## **Image analysis**

All image analysis performed in this study used ZEN Blue (Version 3.1). All measurements of length were made using the “profile” function of ZEN Blue.

To measure hemispindle branch length, maximum intensity projections were made of Airyscan-processed images. Hemispindle branches were first counted and then were measured from the edge of the tubulin staining closest to the MTOC (visible on the NHS Ester channel) to the edge of the tubulin staining furthest away from the MTOC. Nuclei that contained both hemispindles and interpolar spindles were excluded from this analysis. In nuclei that contained multiple MTOCs, it could not always be determined which MTOC each branch was coming from, and so these nuclei were excluded from this analysis.

To measure mitotic spindle length, maximum intensity projections were made of Airyscan-processed images. Mitotic spindle size was measured as the greatest distance between the edge of the tubulin staining that was adjacent to each of the two MTOCs.

## Statistical analyses

This study reports both the measured distances of mitotic and hemispindles, and then estimated actual distances in unexpanded parasites. To estimate actual distances, the mean expansion factor of all gels used in this study was determined (4.3x; Supplementary Figure 1c). All actual distances were then divided by this mean expansion factor to get the actual estimated distances reported in this study.

All graphs and statistical analyses in this study were performed and generated using GraphPad PRISM 9. All values of statistical significance in this study were determined using an unpaired, two-tailed T-test.

## RESULTS

### Ultrastructure expansion microscopy (U-ExM) significantly enhances visualization of microtubule structures in *P. falciparum*

To validate the utility of U-ExM for visualizing microtubules in *P. falciparum*, we first confirmed that we could visualize all previously identified microtubule structures (hemispindle, mitotic spindle, interpolar spindle, subpellicular microtubules) in unexpanded parasites (Figure 1a). Additionally, we incorporated a general protein stain (N-hydroxysuccinimide (NHS) ester). In unexpanded parasites, NHS ester staining did not produce a distinct or recognizable staining pattern. Despite this, NHS ester staining appeared denser around the likely position of the microtubule organizing center (MTOC) prior to segmentation (Figure 1a). Additionally, NHS ester staining appeared denser at the apical tip of merozoites in segmented schizonts, reminiscent of staining previously observed for the double-bulbous rhoptries [36,37] (Figure 1a).

Despite its unclear staining in unexpanded parasites, U-ExM parasites stained with NHS ester allowed the clear and striking identification of many intracellular structures. Through differences in staining intensity, the location of the red blood cell (RBC) membrane, parasite vacuole membrane (PVM) and parasite plasma membrane (PPM) could all be inferred (Figure 1b). Prior to segmentation, the MTOC can be clearly identified based on NHS staining, and it roughly adopts a ‘bell-shape’ with the most intense NHS ester staining at the top of the bell, and least at the bottom. Additionally, comparing NHS ester staining and chromatin staining it can be seen that there is a density of NHS ester on the nuclear side of the MTOC that does not contain chromatin; which likely represents a recently identified chromatin-free nuclear compartment adjacent to the MTOC [16]. In fully segmented schizonts, the MTOC is no longer visible by NHS ester staining but instead we see the characteristic double-club-shaped rhoptries stained prominently (Figure 1b). At the apex of the rhoptry neck a ring structure can be observed (Figure 1b), which is likely the apical polar rings as it attaches to the subpellicular microtubules at the apical end of the parasite. At the basal end of the parasite, the subpellicular microtubules connect to another ring by NHS ester staining that is likely the basal complex (Figure 1b). Notably, microtubule structures themselves were never observed with NHS ester staining alone.

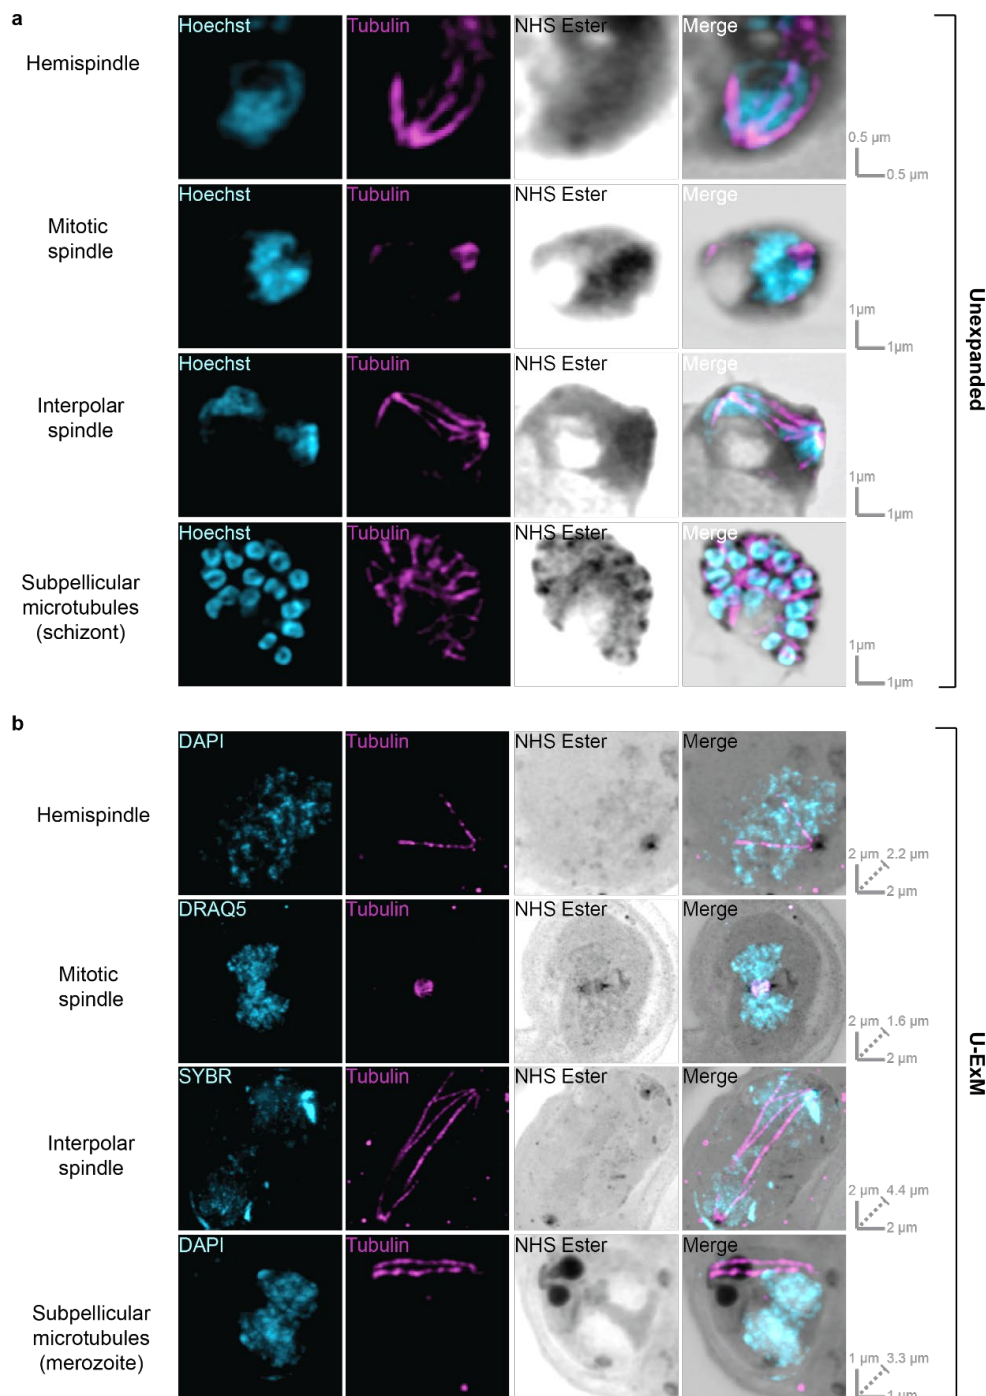

**Figure 1: Comparison between microtubule structures visualized in unexpanded and U-ExM *P. falciparum* asexual blood-stage parasites.**

*MCMBP<sup>HADD</sup>* parasites, cultured in the presence of *Shld1*, were imaged using super-resolution Airyscan microscopy after being prepared for regular immunofluorescence assay (a), or U-ExM (b). All parasites were stained with a nuclear stain (Hoechst, DAPI, DRAQ5, or SYBR in cyan), anti-tubulin (in magenta) and a protein stain (N-hydroxysuccinimide (NHS) Ester in greyscale). All previously identified blood-stage microtubule structures (hemispindle, mitotic spindle, interpolar spindle and subpellicular microtubules) were observed by both IFA and U-ExM. Images in (a) represent a single z-slice from a z-stack image, while images in (b) are maximum-intensity projections. Slice-by-slice videos of images in 1b found in Supplementary Videos 1-4. Scale bars as labelled in each image, solid bars = XY scale, dashed bar = combined depth of slices used for Z-projection.

All microtubule structures were also observed following U-ExM but could be observed in far greater detail with less confounding complexity from neighboring nuclei (Figure 1b). Notably, all the branches of a hemispindle could be readily differentiated including many small branches that previously would have been below the limit of detection (Figure 1b, Figure 2a&b). In mitotic spindles both sides of the spindle, connected to either MTOC, could be differentiated and the individual branches that would connect to the kinetochore during mitosis could be observed (Figure 1b). Interpolar spindles were observed connecting two distant MTOCs (Figure 1b). Additionally, these interpolar spindles were found alongside microtubules that extended most of the way to the other MTOC but not completely, and branches that resembled those in a hemispindle (Figure 1b). In merozoites from segmented schizonts, subpellicular microtubules were observed, with typically 2-4 individual microtubules in each merozoite (Figure 1b). Collectively, this shows that U-ExM, coupled with NHS ester staining, can be used to visualize *P. falciparum* microtubules at a single-nucleus level.

#### **MCMBP deficient parasites display aberrant hemispindles and mitotic spindles.**

It has previously been observed that MCMBP deficient parasites display microtubule defects [25], but due to the resolution limit of conventional light microscopy prevented exploration of the nature of these defects. Given that each of the microtubule structures could be distinguished from each other using U-ExM (Figure 1b), we used this technique to study microtubule formation in MCMBP deficient parasites.

MCMBP<sup>HADD</sup> parasites either in the presence or absence of Shld1 were stained with antibodies against tubulin and centrin, a nuclear stain, and NHS ester. All images were acquired using Airyscan microscopy after U-ExM. In both hemispindles and mitotic spindles, centrin staining colocalized with the previously described ‘bell-shape’ of the MTOC observed on NHS ester staining (Figure 2a&e). Notably, however, centrin staining did not colocalize with the



entirety of the MTOC, with centrin foci contained within a small portion of the whole MTOC. By comparing with the nuclear stain, it could be seen that centrin foci localized towards the cytoplasmic side of the MTOC structure, suggesting that *P. falciparum* may compartmentalize subsets of proteins inside the MTOC.

In MCMBP deficient parasites, MTOC staining often appeared aberrant with misplaced centrin foci (Figure 2e). However, these defects were not consistent or easily quantifiable by regular microscopy measurement techniques. The nature of these defects is unclear but suggest that MCMBP knockdown may alter the formation or integrity of the MTOC.

In the presence of Shld1 (Figure 2a), hemispindle branches were on average 732 nm in length ( $\pm 498$  nm SD) (Figure 2b), with the longest branch in each hemispindle being 1260 nm ( $\pm 512$  nm SD) (Figure 2c), and each hemispindle containing 5 branches ( $\pm 2.2$  SD) (Figure 2d). In the absence of Shld1 (Figure 2a), hemispindle branches were on average 31.4 % longer (1067 nm  $\pm 815$  nm SD) (Figure 2b), with the longest branch in each hemispindle being 32.5 % longer (1866 nm  $\pm 936$  nm SD) (Figure 2c), and each hemispindle containing 18.3 % more branches (6.2 branches  $\pm 2.8$  SD) (Figure 2d). This suggests that control of hemispindle branch length and number is altered in MCMBP deficient parasites.

Mitotic spindles from parasites cultures either in the presence or absence of Shld1 were also imaged and measured (Figure 2e). In the presence of Shld1, mitotic spindles form in an orderly fashion with branches that extend from each of the MTOC towards the opposing MTOC and meet near the middle. By contrast, in the absence of Shld1, branches from the mitotic spindle appeared more heterogeneous in length, but do not appear to extend towards the other MTOC or meet near the middle of the two MTOCs. Moreover, mitotic spindles were 23% larger in the absence of Shld1 (691 nm  $\pm 202$  nm SD) than in the presence of Shld1 (529 nm  $\pm 76$  nm SD) (Figure 2f). This suggests that MCMBP deficient parasites form larger mitotic spindles, where the organization and positioning of spindle branches is aberrant.



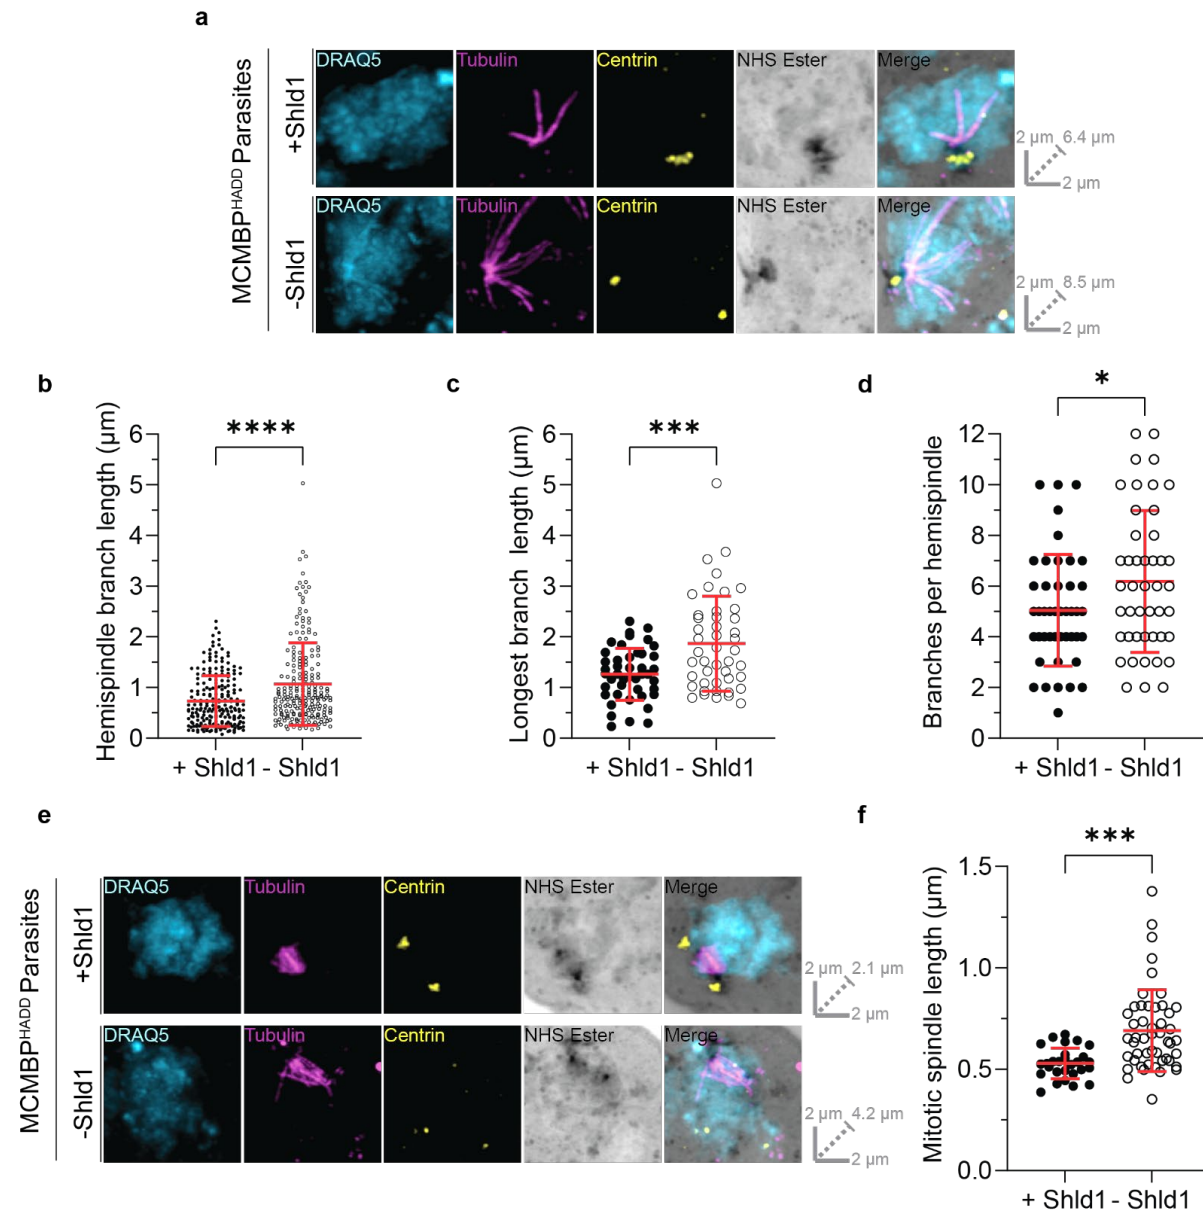

**Figure 2. MCMBP deficient parasites show defects in both mitotic spindle and hemispindle formation.**

*MCMBP<sup>HADD</sup>* parasites were cultured [+]/[-] *Shld1*. Parasites were then prepared for U-ExM, stained with a nuclear stain (DRAQ5, in cyan), anti-tubulin (in magenta), anti-centrin (in yellow), and a protein stain (NHS Ester, in grayscale), and visualized using Airyscan microscopy. **(a)** Hemispindles were imaged and the length of all hemispindle branches **(b)**, of the longest branch in each individual hemispindle **(c)**, and the total number of branches per hemispindle **(d)** were all measured.  $n = 221$  hemispindle branches and 45 hemispindles for +*Shld1*, and 214 hemispindle branches and 45 hemispindles for -*Shld1* were measured across 3 biological replicates. **(e)** Mitotic spindles were imaged and their length **(f)**, from one MTOC to another, was measured.  $n = 28$  for +*Shld1* and 49 for -*Shld1*, across 3 biological replicates. All distance measurements presented here have been estimated based on the average expansion factor of gels used in this study, raw values can be found in Supplementary Figure 2. (\* =  $p < 0.05$ , \*\*\* =  $p < 0.001$ , \*\*\*\* =  $p < 0.0001$  by unpaired two-tailed t-test, error bars = SD). All images are maximum intensity projections. Slice-by-slice videos of images in found in Supplementary Videos 5-8. Scale bars as labelled in each image, solid bars = XY scale, dashed bar = combined depth of slices used for Z-projection.

## **BODIPY TR ceramide stains the nuclear envelope of *P. falciparum* imaged by U-ExM.**

*Plasmodium* undergoes mitosis without breakdown of the nuclear envelope, and in doing so the nuclear envelope provides a critical barrier for the compartmentalization of the nucleus from the cytoplasm. Therefore, nuclear envelope integrity and remodeling are critical during *Plasmodium* mitosis. Despite the importance of nuclear envelope dynamics during schizogony, and *Plasmodium* mitosis, there is currently no reliable marker of the *P. falciparum* nuclear envelope for microscopic visualization. Previous studies have localized a few nucleoporins (nups) to the nuclear envelope of either *P. falciparum* [16,38] or *P. berghei* [39], but their distribution and number is dynamic across the lifecycle, limiting the robustness of nups as nuclear envelope markers. Therefore, we wanted to identify a uniform, U-ExM compatible stain for the *P. falciparum* nuclear envelope to allow us to study nuclear envelope changes in the context of MCMBP deficient parasites.

BODIPY TR ceramide (BODIPY TRc) is a commonly used fluorescent lipid stain, which has previously been used to stain live parasites from multiple different parasite lifecycle stages, across *P. falciparum* and *P. berghei*, and imaged in both fixed and live-cell microscopy [39-43]. Despite its extensive use, BODIPY TRc has not previously been reported to stain the nuclear envelope of *P. falciparum*. We coupled BODIPY TRc with U-ExM, with BODIPY TRc staining occurring post-expansion. Remarkably, we found that the *P. falciparum* nuclear envelope is consistently and reliably labelled by BODIPY TRc (Figure 3a). In addition to staining the nuclear envelope, BODIPY TRc enabled observation of the RBC membrane, PVM, PPM, and endoplasmic reticulum as previously demonstrated when staining live parasites [42-46] (Supplementary Figure 3). Together, we demonstrate that BODIPY TRc is the first *Plasmodium* nuclear envelope marker enabled by U-ExM.

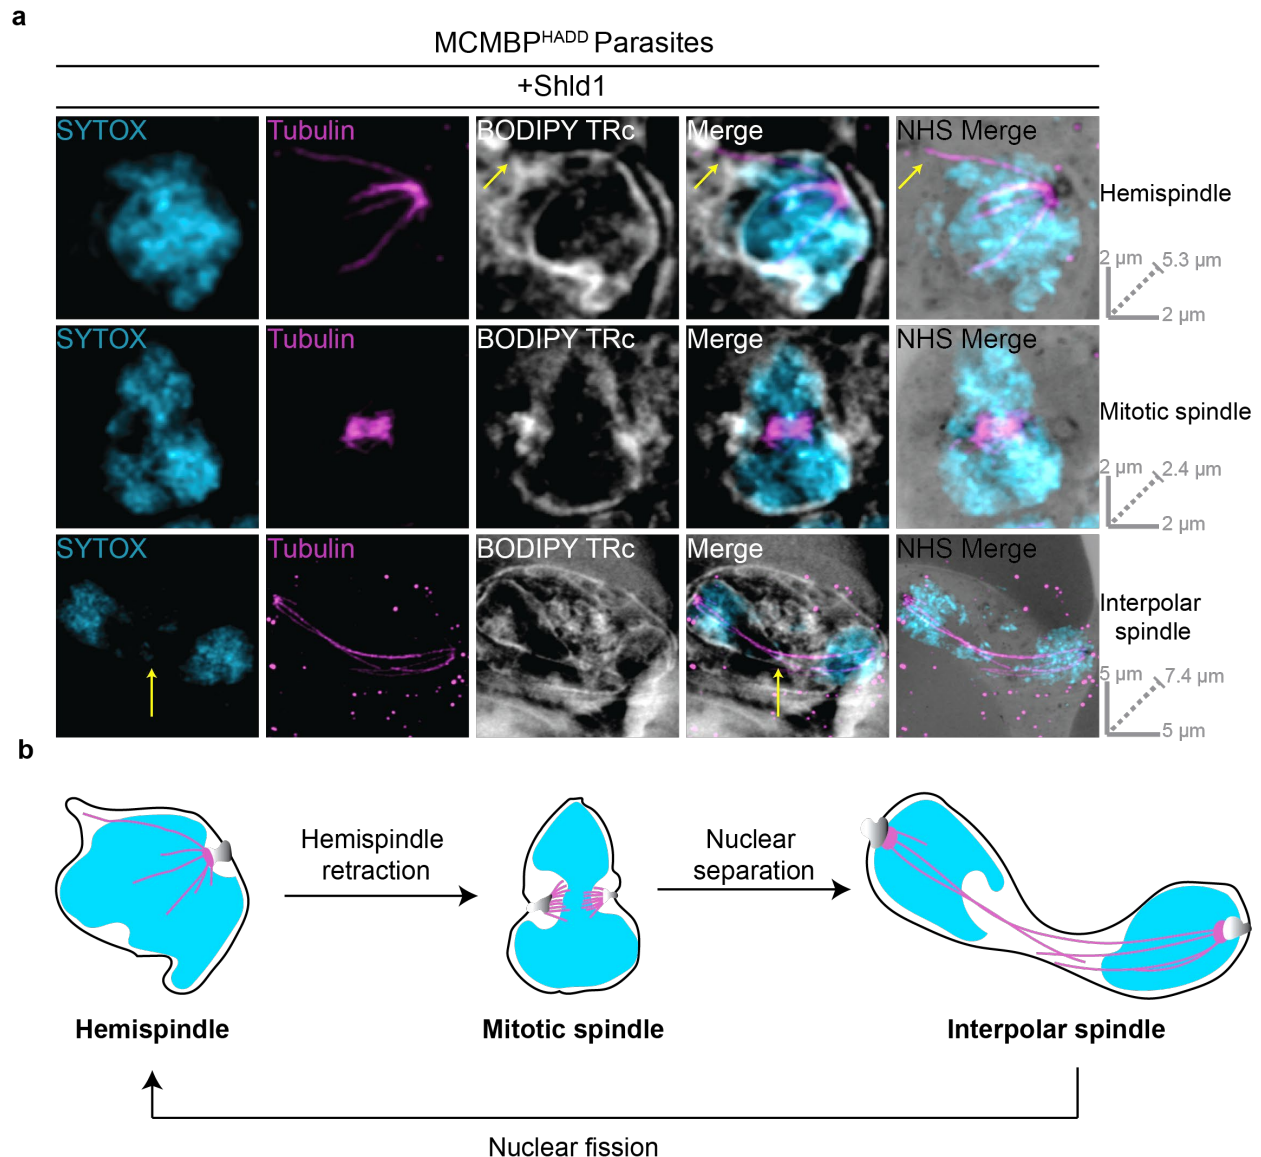

**Figure 3. Nuclear envelope visualized using BODIPY TRc and U-ExM during mitosis of *P. falciparum* blood-stage.**

**(a)** MCMBP<sup>HADD</sup> parasites were cultured either in the presence) of Shld1. Parasites were then prepared for U-ExM, stained with a nuclear stain (SYTOX, in cyan), anti-tubulin (in magenta), a membrane stain (BODIPY Texas Red ceramide (TRc), in white), and a protein stain (NHS Ester, in grayscale), and visualized using Airyscan microscopy. Hemispindle arrow indicates microtubule not associated with chromatin. Interpolar spindle arrow indicates chromatin-free bridge region. Images containing BODIPY TRc are average intensity projections, while those with NHS ester are maximum intensity projections. Slice-by-slice videos of images in 3a found in Supplementary Videos 9-11. Scale bars as labelled in each image, solid bars = XY scale, dashed bar = combined depth of slices used for Z-projection. **(b)** Model for the progression between observed microtubule structures. Hemispindles are first observed but retract before formation of the mitotic spindle once DNA replication has occurred. After the formation of the mitotic spindle, two masses of DNA separate from each other but remain in a shared nuclear envelope with their MTOCs connected by the interpolar spindle. The nucleus then undergoes nuclear fission, separating the two separated DNA masses into daughter nuclei. Following nuclear fission, the hemispindle reforms and further rounds of mitosis occur.

To assess the relationship between intranuclear microtubule structures and the nuclear envelop, BODIPY TRc was coupled with U-ExM and tubulin staining (Figure 3a). Nuclei possessing each of the three microtubule structures display differently shaped nuclear envelopes. Nuclei with hemispindles show largely spherical nuclear envelopes, with some notable protrusions of the nuclear envelope to accommodate a hemispindle branch (Figure 3a). Nuclei with mitotic spindles display a marked pinching of the nuclear envelope around the site of the two MTOCs (Figure 3a). Nuclei with interpolar spindles show nuclear envelopes that look characteristically similar to the ‘dumbbell-shape’ of segregating nuclei in fission yeast (Figure 3a) [24]. Notably, the long and thin bridge region lacks chromatin staining and the interpolar spindles themselves are often present extremely close to the nuclear envelope. By coupling of BODIPY TRc and U-ExM, we refined our model for the progression of intranuclear microtubule structures in *P. falciparum* (Figure 3b).

#### **MCMBP deficient parasites form anaphase chromatin bridges, leading to uneven DNA segregation and aneuploidy but still form subpellicular microtubules.**

It had previously been observed that MCMBP deficient parasites form complex aberrant spindles and hypothesized that chromatin connected multiple nuclei [25]. In the absence of a nuclear envelope marker, and at the resolution of conventional light microscopy, it could not be determined if these shared a single intact nuclear envelope. By visualizing interpolar spindles of MCMBP-deficient parasites at higher resolution, we were able to update this model. Most prominently, in all interpolar spindles imaged after expansion, there was significant DNA staining inside the bridge region of nuclei connected by interpolar spindles (Figure 4) (Supplementary Figure 4); reminiscent of chromatin bridges that occur during a defective anaphase of other organisms [47,48]. This contrasts with MCMBP<sup>HADD</sup> parasites grown in the presence of Shld1, where DNA staining was not observed inside this bridge region



(Figure 1b,3a). We observed dividing nuclei with interpolar spindles where each nucleus was of vastly different size, potentially indicating uneven DNA segregation (Supplementary Figure 4). Moreover, we also observed interpolar spindles connecting MTOCs in nuclei that did not appear to be separating from each other at all (Supplementary Figure 4). Collectively, this suggests that MCMBP deficient parasites can form interpolar spindles but are unable to evenly segregate DNA into daughter nuclei.

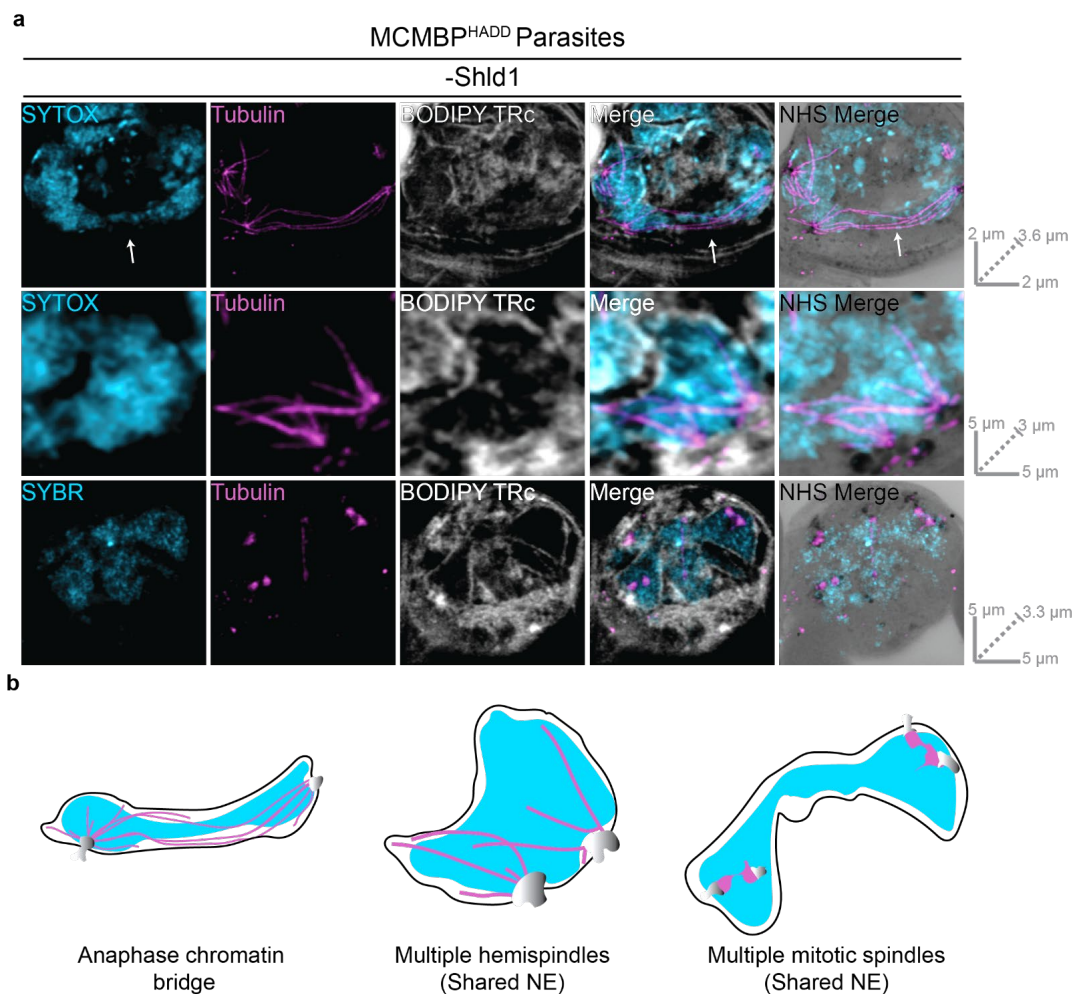

**Figure 4. MCMBP deficient parasites show defective interpolar spindles, uneven DNA segregation and aneuploidy without cell cycle arrest.**

(a) MCMBP<sup>HADD</sup> parasites were cultured either in the or absence of Shld1. Parasites were then prepared for U-ExM, stained with a nuclear stain (SYTOX or SYBR, in cyan), anti-tubulin (in magenta), a membrane stain (BODIPY TRc, in white), and a protein stain (NHS Ester, in grayscale), and visualized using Airyscan microscopy. Arrow indicates DNA staining in bridge-region. Images containing BODIPY TRc are average intensity projections, while those with NHS ester are maximum intensity projections. Slice-by-slice videos of images in 4a found in Supplementary Videos 12-14. Scale bars as labelled in each image, solid bars = XY scale, dashed bar = combined depth of slices used for Z-projection. (b) Schematic representation of phenotypes overserved in Figure 4a.

In MCMBP<sup>HADD</sup> parasites grown in the absence of Shld1, we also frequently observed a single nuclear envelope that contained multiple microtubule structures and multiple MTOCs not connected by an interpolar spindle (Supplementary Figure 4). Nuclei were observed that contained two hemispindles and two MTOCs, which likely represent nuclei where nuclear fission either did not occur or had occurred aberrantly (Figure 4) (Supplementary Figure 4). Additionally, nuclei that contained two mitotic spindles and four MTOCs were also observed (Figure 4). This suggests that in the aberrant nuclei that contain two MTOCs after mitosis, both MTOCs can duplicate and form mitotic spindles in the same nucleus. Collectively, these observations suggest that MCMBP deficient parasites undergo uneven DNA segregation, leading to aneuploidy and nuclear fission defects, but that these defects don't inhibit further rounds of mitosis as shown previously [25].

Following multiple rounds of mitosis, *P. falciparum* commits to segmentation whereby nuclei and other organelles are enclosed into an individual PPM to form merozoites. In segmented merozoites, the MTOC is no longer visible by NHS ester staining and there are no visible intranuclear microtubule structures (Figure 1b). During segmentation, the only visible microtubules are the subpellicular microtubules, which extend from apical polar ring 2 at the apical end of the merozoite to the basal complex as segmentation progresses (Figure 1b) [12,49-51]. MCMBP is not expressed while parasites are undergoing segmentation [25], but considering that MCMBP deficient parasites show intranuclear microtubule defects (Figure 2) (Figure 4) (Supplementary Figure 4), it could be hypothesized that MCMBP knockdown causes downstream subpellicular microtubule defects. To determine whether MCMBP knockdown caused global microtubule defects, or only of the intranuclear microtubules, we analyzed MCMBP<sup>HADD</sup> parasites grown in the presence of absence of Shld1 that had been arrested post-segmentation with the schizont egress inhibitor E64 [34] by U-ExM.

In merozoites from MCMBP<sup>HADD</sup> schizonts grown in the absence of Shld1 subpellicular microtubules were observed (Supplementary Figure 5), suggesting that MCMBP deficient parasites do not display a global microtubule polymerization defect. However, through NHS ester and BODIPY TRc staining, it was observed that some merozoites contained multiple sets of subpellicular microtubules (Supplementary Figure 5). Additionally, merozoites had vastly differently sized nuclei and contained different varying numbers of rhoptries (Supplementary Figure 5). This confirmed previous observations that merozoites from segmented MCMBP deficient schizonts displayed aneuploidy [25]. Additionally, zoid merozoites, which lack DNA, were observed and they too contained subpellicular microtubules.

Collectively, these results show that MCMBP deficient parasites form anaphase chromatin bridges and fail to undergo correct nuclear fission, resulting in aneuploidy and the presence of multiple microtubule structures inside the same nucleus (Figure 5). Despite these severe nuclear defects, these parasites undergo further rounds of mitosis and still undergo segmentation and form subpellicular microtubules; suggesting that MCMBP knockdown doesn't cause global microtubule polymerization defects (Figure 5).

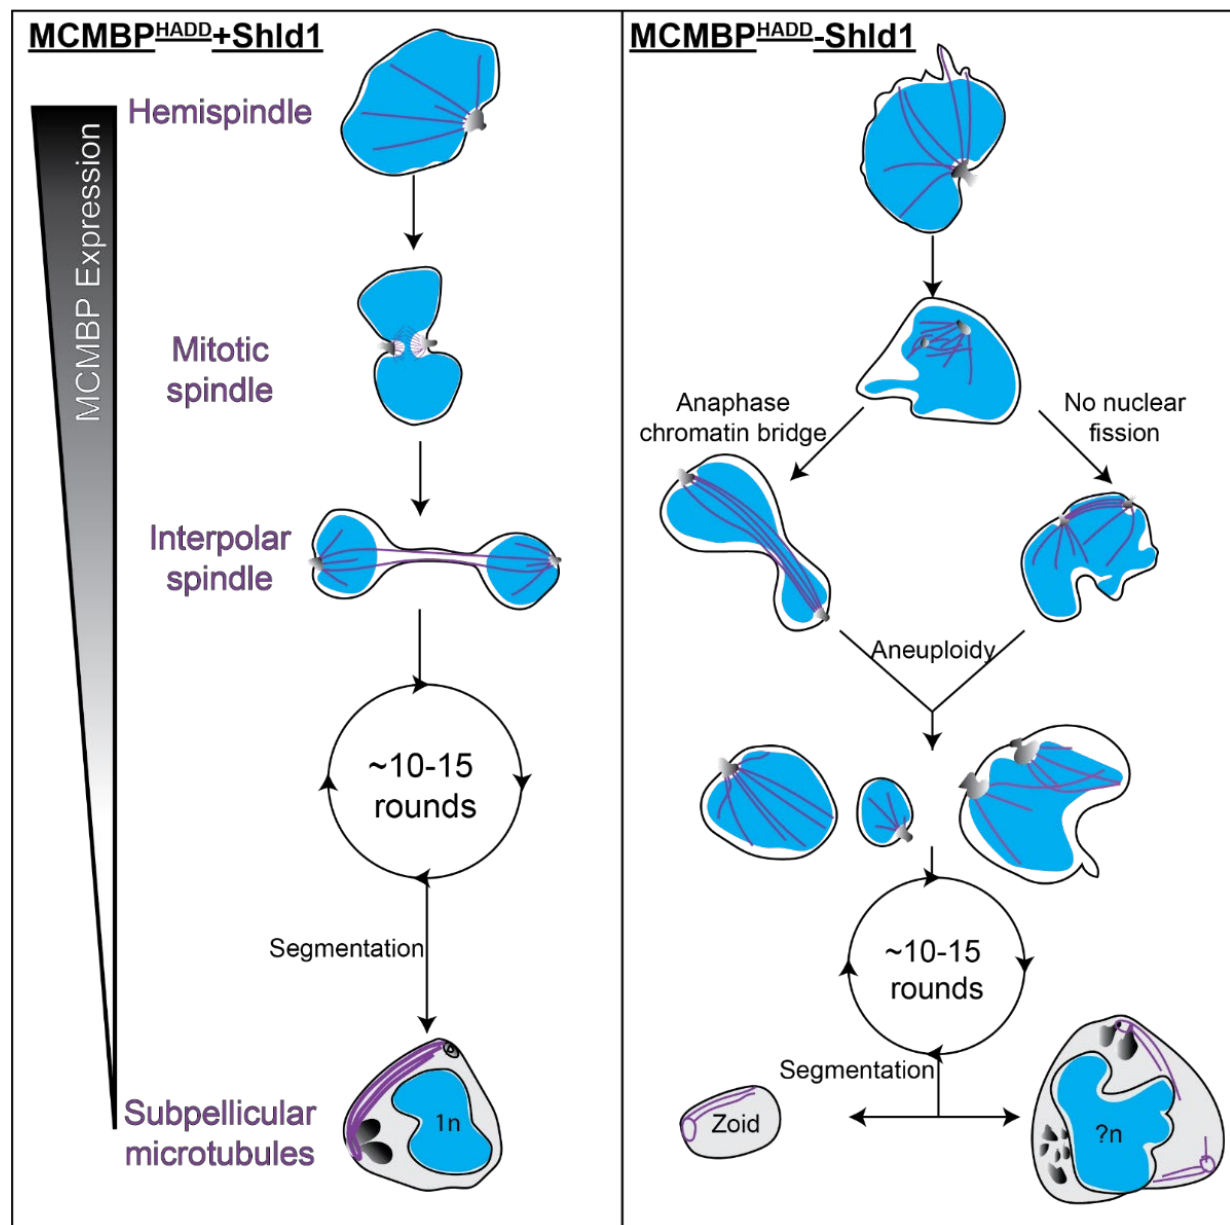

476

477 **Figure 5. Aneuploidy in MCMBP-deficient parasites is likely caused by the formation of anaphase**  
 478 **chromatin bridges and aberrant nuclear fission.**

479 Hypothetical model for the progression of mitosis and segmentation in MCMBP<sup>HADD</sup> parasites either in the  
 480 presence (left) or absence (right) of Shld1. In the presence of Shld1, nuclei with a single MTOC form a  
 481 hemispindle. This hemispindle retracts and the MTOC duplicates and migrates to the opposing side of the nucleus  
 482 to form the mitotic spindle. The two MTOCs then move away from each other but remain connected by the  
 483 interpolar spindle. The nucleus then undergoes nuclear fission in the DNA-free bridge region to form two  
 484 daughter nuclei that each reform a hemispindle. The parasite undergoes multiple rounds of mitosis in this manner.  
 485 MCMBP is no longer expressed when the parasite commits to segmentation and the formation of merozoites,  
 486 where we observe subpellicular microtubules connecting the apical polar ring and basal complex. In the absence  
 487 of Shld1 we observe aberrant hemispindles and mitotic spindles. After forming the mitotic spindle, these nuclei  
 488 form interpolar spindles, but either form anaphase chromatin bridges and/or fail to undergo nuclear fission,  
 489 which both lead to aneuploidy. Aneuploid nuclei continue to undergo further rounds of mitosis and do undergo  
 490 segmentation. Segmentation, however, leads to the formation of cells of various size, including zoid parasites,  
 491 which lack nuclei, and large merozoites that contain multiple sets of organelles and more than 1n DNA content.  
 492 Blue = nuclei, purple = microtubules, greyscale = MTOC or rhoptries (in merozoites). n = number of genome  
 493 copies, ?n = unknown/uneven genome content.



## 494 DISCUSSION

495 The development of U-ExM and application to *P. falciparum* parasites, have allowed  
496 us to understand the functions of proteins and processes of *P. falciparum* to a level of detail  
497 not previously possible. We applied U-ExM in the context of MCMBP deficient parasites to  
498 significantly refine our understanding of the function of this protein during blood-stage  
499 replication of *P. falciparum*.

500 The U-ExM protocol used in this study is largely similar previously published protocols  
501 [16,22,35], with the notable modification of changing the protein crosslinking (FA/AA)  
502 incubation step from 5 hours to overnight, which significantly shortened day 1 of the U-ExM  
503 protocol. In this study, we harvested parasites at multiple timepoints throughout the lifecycle,  
504 and all -Shld1 cultures were harvested 3 hours after their +Shld1 counterparts due to the  
505 documented growth delay [25]. This shortening of day 1 of the U-ExM protocol made the  
506 protocol far more practical, enabling the study of multiple synchronized lifecycle stages  
507 without needing to perform independent experiments.

508 In addition to highlighting new biology, our application of U-ExM allowed us to  
509 identify some potential drawbacks of this technique. Notably absent in all images of U-ExM  
510 parasites were the food vacuole and hemozoin crystal. Through NHS ester staining of  
511 unexpanded parasites (Figure 1a), the likely location of the hemozoin crystal and food vacuole  
512 could be inferred due to a distinct lack of staining. By contrast, there was no indication on U-  
513 ExM parasites of where the hemozoin crystal or food vacuole membrane would be located  
514 based on NHS ester or BODIPY TRc staining. We hypothesize that the hemozoin crystal either  
515 does not get anchored, or does not expand with the gel, potentially limiting the utility of U-  
516 ExM for studies of hemoglobin catabolism and hemozoin biomineralization.

In this study a wide range of chromatin stains were used on U-ExM parasites: DAPI, DRAQ5, SYBR Green and SYTOX red. Notably, all these stains showed considerably more photobleaching than we would observe in unexpanded parasites; particularly SYBR Green, which began visibly photobleaching almost immediately. The reason for this is not clear, but it should be noted that while in unexpanded MCMBP deficient parasites a clear nuclear staining defect was observed [25], the same could not be readily observed in U-ExM parasites. At the concentrations used in this study, we found SYTOX red to be the brightest and most photostable of the chromatin stains used. Potentially related to the changes in chromatin was our inability to localize MCMBP by U-ExM. MCMBP has previously been localized in unexpanded parasites, showing nuclear and cytoplasmic foci [25]. Despite this, our attempts to localize MCMBP by U-ExM showed no significant signal. It has been noted previously that some antibodies appear to be incompatible with U-ExM [35], although the reasons for this are unclear, but this does not appear to be the case as the anti-HA antibody we used to detect MCMBP has previously been used successfully on U-ExM samples [16]. Given that the canonical role of MCMBP is to bind DNA, and we observe significant differences in the appearance of DNA in U-ExM parasites, it is possible that some DNA-binding proteins are not retained after U-ExM.

BODIPY TRc stained parasites presented in this study were stained post-expansion. We attempted to stain live cells with BODIPY TRc or include BODIPY TRc with the primary or secondary antibody incubations but this uniformly resulted in extremely faint staining (data not shown). Additionally, we tried to stain parasites with Nile red, which has previously been shown to stain some organelles in unexpanded *P. falciparum* blood-stage parasites [44]; but this was also unsuccessful (data now shown). Overall, this suggests that potentially large differences exist in the fluorescent stains that are compatible with unexpanded *P. falciparum* compared to with U-ExM.

BODIPY TRc staining of schizonts allowed visualization of the PPM of each merozoite, the PVM, RBC membrane and nuclear envelope, but did not reveal any structures that could be characteristically identified as the apicoplast or mitochondrion as have been identified by EM studies [12]. Additionally, both the surface and lumen the rhoptries of merozoites stained very strongly with BODIPY TRc, which would support previous observations that the rhoptries contain membranous whorls [50,52]. To date, these membranous whorls have not been observed by light microscopy [53], highlighting the use of U-ExM coupled with BODIPY TRc for studying merozoite physiology.

We show that MCMBP knockdown results in the aberrant formation of all intranuclear microtubule structures but not of subpellicular microtubules, which are formed when MCMBP is no longer expressed [25]. Moreover, the combination of NHS ester and BODIPY TRc with U-ExM allowed us to assess the MTOC and nuclear envelope at a level of detail reminiscent of electron microscopy. This also confirmed that the in the blood-stage of *P. falciparum* the MTOC spans the nuclear envelope, as previously reported [16]. The combination of BODIPY TRc and NHS ester staining allowed us to show that aneuploidy in MCMBP deficient parasites is due formation of anaphase chromatin bridges and/or a lack of nuclear fission (Figure 5). We hypothesize that these lead to the downstream phenotypes we see of wildly varied nuclear size and zoid merozoites following cytokinesis.

The observation of anaphase chromatin bridges in MCMBP-deficient parasites is supported by the canonical function in the MCM complex [26]. In other organisms, the presence of MCMBP has been shown to promote dissociation between the MCM complex and chromatin, allowing separation of sister chromatids [54-56]. Moreover, MCMBP of *P. falciparum* has been shown to interact with the members of the condensin complex structural maintenance of chromosomes (SMC) 2 and 4 [25]. SMC2 and SMC4 have canonical roles in chromosome condensation [57,58], and have recently been shown to be involved in *Plasmodium*

chromosome separation [59]. Inhibition of SMC2 [60], SMC4 [61] and MCM complex member MCM7 [62] have all been shown to lead to the formation of anaphase chromatin bridges in other organisms. Therefore, we suggest that the observation of anaphase chromatin bridges in MCMBP-deficient *P. falciparum* may be caused by either an ability to properly separate sister chromatids, or a defect in the detachment of microtubules from chromosomes. Currently, the relationship between the formation of anaphase chromatin bridges and nuclear fission is unclear. But given that inhibition of SMC2, SMC4, and MCM7 causes anaphase chromatin bridges in organisms that undergo open mitosis, and therefore do not undergo nuclear fission, defective nuclear fission is not a pre-requisite for the formation of anaphase chromatin bridges.

While we observe anaphase chromatin bridges and multiple microtubule structures in a single nucleus following depletion of MCMBP, using MCMBP<sup>HADD</sup> parasites these events do not occur in every round of mitosis. If this were the case, we would expect to see all chromatin staining contained within a single, giant, nuclear envelope, but we do not. Given that the knockdown system used leads to imperfect and uneven depletion of MCMBP, it is possible that the phenotypic heterogeneity we observe is a product of differing levels of MCMBP. MCMBP is likely essential for growth in the blood-stage of *Plasmodium* [63,64], and we hypothesize that the complete removal of MCMBP would lead to the formation of anaphase chromatin bridges and inhibited nuclear fission in every round of mitosis.

Our observations of microtubules, following U-ExM, were largely concordant with recent studies that also made measurements of branch and spindle lengths [16,22]. Measurements for mitotic spindle length, hemispindle branch length and hemispindle branch number all reported similar results [16,22]. Neither data set, however, controlled for the number of nuclei per cell and so it is currently unclear whether any of these measurements change later in the parasite lifecycle. One difference observed in our study however, was the presence of hemispindle-like branches in nuclei connected by interpolar spindles (referred to

as anaphase spindles in that study) [16]. Previous images have only observed the long  
interpolar branches connecting the MTOCs, without smaller branches in each nucleus [16].  
Critically, a previous hypothesis suggested that the hemispindle formed as a remnant of the  
retraction of the interpolar spindle [65]. Our observation that the two seem to co-exist would  
suggest that this is not the case. Moreover, this suggests that whatever the function(s) of  
hemispindles are, likely begin immediately following nuclear segregation and before nuclear  
fission.

Overall, this study provides insight into the poorly understood, yet therapeutically  
attractive and biologically fascinating, process of mitosis in *P. falciparum*. Our findings  
significantly further our understanding of the phenotype of parasites following knockdown of  
MCMBP. Importantly, these insights were only possible because of the application of U-ExM  
to *P. falciparum*. Moreover, we developed BODIPY TRc as the first U-ExM-compatible stain  
to visualize the nuclear envelope and used this to develop our understanding of both MCMBP  
deficient parasites, and parasite physiology more broadly.

## ACKNOWLEDGEMENTS

We thank Jeff Dvorin for provision of anti-BIP antibodies. We thank Julien Guizetti,  
Eloïse Bertiaux, Vincent Louvel, Caroline Simon, and Johanna Bauer for their help with U-  
ExM setup. We also thank Julien Guizetti for help with sample preparation when imaging  
microtubules. We thank Rachel Rudlaff and James Blauwkamp for critical reading of the  
manuscript.

614

## AUTHOR CONTRIBUTIONS

615 Conceptualization, B.L. and S.A.; methodology, B.L.; formal analysis, B.L.; writing—  
616 original draft preparation, B.L.; writing—review and editing, B.L. and S.A.; supervision, S.A.;  
617 project administration, S.A.; funding acquisition, S.A. All authors have read and agreed to the  
618 published version of the manuscript.

619

## COMPETING INTERESTS

620 The authors declare no conflict of interest. The funders had no role in the design of the  
621 study; in the collection, analyses, or interpretation of data; in the writing of the manuscript, or  
622 in the decision to publish the results.

623

## REFERENCES

- 624 1. World\_Health\_Organization. *World Malaria Report 2020*; 2020.
- 625 2. Imwong, M.; Dhorda, M.; Myo Tun, K.; Thu, A.M.; Phyo, A.P.; Proux, S.;  
626 Suwannasin, K.; Kunasol, C.; Srisutham, S.; Duanguppama, J.; et al. Molecular  
627 epidemiology of resistance to antimalarial drugs in the Greater Mekong subregion: an  
628 observational study. *The Lancet Infectious Diseases* **2020**, *20*, 1470-1480,  
629 doi:[https://doi.org/10.1016/S1473-3099\(20\)30228-0](https://doi.org/10.1016/S1473-3099(20)30228-0).
- 630 3. Menard, D.; Dondorp, A. Antimalarial Drug Resistance: A Threat to Malaria  
631 Elimination. *Cold Spring Harbor Perspectives in Medicine* **2017**, *7*,  
632 doi:10.1101/cshperspect.a025619.
- 633 4. Ashley, E.A.; Dhorda, M.; Fairhurst, R.M.; Amaratunga, C.; Lim, P.; Suon, S.; Sreng,  
634 S.; Anderson, J.M.; Mao, S.; Sam, B.; et al. Spread of artemisinin resistance in  
635 *Plasmodium falciparum* malaria. *N Engl J Med* **2014**, *371*, 411-423,  
636 doi:10.1056/NEJMoa1314981.
- 637 5. Uwimana, A.; Legrand, E.; Stokes, B.H.; Ndikumana, J.M.; Warsame, M.; Umulisa,  
638 N.; Ngamije, D.; Munyaneza, T.; Mazarati, J.B.; Munguti, K.; et al. Emergence and  
639 clonal expansion of *in vitro* artemisinin-resistant *Plasmodium falciparum* kelch13  
640 R561H mutant parasites in Rwanda. *Nat Med* **2020**, *26*, 1602-1608,  
641 doi:10.1038/s41591-020-1005-2.

- 642 6. Balikagala, B.; Fukuda, N.; Ikeda, M.; Katuru, O.T.; Tachibana, S.-I.; Yamauchi, M.;  
643 Opio, W.; Emoto, S.; Anywar, D.A.; Kimura, E.; et al. Evidence of Artemisinin-  
644 Resistant Malaria in Africa. *New England Journal of Medicine* **2021**, 385, 1163-1171,  
645 doi:10.1056/NEJMoa2101746.
- 646 7. Pham, T.D.M.; Ziora, Z.M.; Blaskovich, M.A.T. Quinolone antibiotics.  
647 *Medchemcomm* **2019**, 10, 1719-1739, doi:10.1039/c9md00120d.
- 648 8. Magden, J.; Kääriäinen, L.; Ahola, T. Inhibitors of virus replication: recent  
649 developments and prospects. *Appl Microbiol Biotechnol* **2005**, 66, 612-621,  
650 doi:10.1007/s00253-004-1783-3.
- 651 9. Berdis, A.J. Inhibiting DNA Polymerases as a Therapeutic Intervention against  
652 Cancer. *Frontiers in Molecular Biosciences* **2017**, 4, doi:10.3389/fmolb.2017.00078.
- 653 10. Belete, T.M. Recent Progress in the Development of New Antimalarial Drugs with  
654 Novel Targets. *Drug Des Devel Ther* **2020**, 14, 3875-3889,  
655 doi:10.2147/DDDT.S265602.
- 656 11. Francia, M.E.; Striepen, B. Cell division in apicomplexan parasites. *Nature Reviews*  
657 *Microbiology* **2014**, 12, 125-136, doi:10.1038/nrmicro3184.
- 658 12. Rudlaff, R.M.; Kraemer, S.; Marshman, J.; Dvorin, J.D. Three-dimensional  
659 ultrastructure of *Plasmodium falciparum* throughout cytokinesis. *PLOS Pathogens*  
660 **2020**, 16, e1008587, doi:10.1371/journal.ppat.1008587.
- 661 13. Rudlaff, R.M.; Kraemer, S.; Strevi, V.A.; Dvorin, J.D. An essential contractile ring  
662 protein controls cell division in *Plasmodium falciparum*. *Nature Communications*  
663 **2019**, 10, 2181, doi:10.1038/s41467-019-10214-z.
- 664 14. Gerald, N.; Mahajan, B.; Kumar, S. Mitosis in the Human Malaria Parasite  
665 *Plasmodium falciparum*. *Eukaryotic Cell* **2011**, 10, 474-482,  
666 doi:10.1128/EC.00314-10.
- 667 15. Read, M.; Sherwin, T.; Holloway, S.P.; Gull, K.; Hyde, J.E. Microtubular  
668 organization visualized by immunofluorescence microscopy during erythrocytic  
669 schizogony in *Plasmodium falciparum* and investigation of post-translational  
670 modifications of parasite tubulin. *Parasitology* **1993**, 106 ( Pt 3), 223-232,  
671 doi:10.1017/s0031182000075041.
- 672 16. Simon, C.S.; Funaya, C.; Bauer, J.; Voß, Y.; Machado, M.; Penning, A.; Klaschka,  
673 D.; Cyrklaff, M.; Kim, J.; Ganter, M.; et al. An extended DNA-free intranuclear  
674 compartment organizes centrosomal microtubules in *Plasmodium falciparum*. *Life*  
675 *Science Alliance* **2021**, 4, e202101199, doi:10.26508/lsa.202101199.
- 676 17. Mehnert, A.-K.; Simon, C.S.; Guizetti, J. Immunofluorescence staining protocol for  
677 STED nanoscopy of *Plasmodium*-infected red blood cells. *Molecular and*  
678 *Biochemical Parasitology* **2019**, 229, 47-52,  
679 doi:<https://doi.org/10.1016/j.molbiopara.2019.02.007>.



18. Schrével, J.; Asfaux-Foucher, G.; Bafort, J.M. Ultrastructural study of multiple mitoses during sporogony of *Plasmodium b. berghei*. *J Ultrastruct Res* **1977**, *59*, 332-350, doi:10.1016/s0022-5320(77)90043-0.
19. Fennell, B.J.; Naughton, J.A.; Dempsey, E.; Bell, A. Cellular and molecular actions of dinitroaniline and phosphorothioamidate herbicides on *Plasmodium falciparum*: tubulin as a specific antimalarial target. *Mol Biochem Parasitol* **2006**, *145*, 226-238, doi:10.1016/j.molbiopara.2005.08.020.
20. Fennell, B.J.; Al-shatr, Z.A.; Bell, A. Isotype expression, post-translational modification and stage-dependent production of tubulins in erythrocytic *Plasmodium falciparum*. *Int J Parasitol* **2008**, *38*, 527-539, doi:10.1016/j.ijpara.2007.09.005.
21. Zeeshan, M.; Pandey, R.; Ferguson, D.J.P.; Tromer, E.C.; Markus, R.; Abel, S.; Brady, D.; Daniel, E.; Limenitakis, R.; Bottrill, A.R.; et al. Real-time dynamics of *Plasmodium* NDC80 reveals unusual modes of chromosome segregation during parasite proliferation. *Journal of Cell Science* **2020**, *134*, doi:10.1242/jcs.245753.
22. Bertiaux, E.; Balestra, A.C.; Bournonville, L.; Louvel, V.; Maco, B.; Soldati-Favre, D.; Brochet, M.; Guichard, P.; Hamel, V. Expansion microscopy provides new insights into the cytoskeleton of malaria parasites including the conservation of a conoid. *PLOS Biology* **2021**, *19*, e3001020, doi:10.1371/journal.pbio.3001020.
23. Rashpa, R.; Brochet, M. Ultrastructure expansion microscopy of *Plasmodium* gametocytes reveals the molecular architecture of a microtubule organisation centre coordinating mitosis with axoneme assembly. *bioRxiv* **2021**, 2021.2007.2021.453039, doi:10.1101/2021.07.21.453039.
24. Dey, G.; Culley, S.; Curran, S.; Schmidt, U.; Henriques, R.; Kukulski, W.; Baum, B. Closed mitosis requires local disassembly of the nuclear envelope. *Nature* **2020**, *585*, 119-123, doi:10.1038/s41586-020-2648-3.
25. Absalon, S.; Dvorin, J.D. Depletion of the mini-chromosome maintenance complex binding protein allows the progression of cytokinesis despite abnormal karyokinesis during the asexual development of *Plasmodium falciparum*. *Cellular Microbiology* **2021**, *23*, e13284, doi:<https://doi.org/10.1111/cmi.13284>.
26. Quimbaya, M.; Raspé, E.; Denecker, G.; De Craene, B.; Roelandt, R.; Declercq, W.; Sagaert, X.; De Veylder, L.; Berx, G. Dereglulation of the replisome factor MCMBP prompts oncogenesis in colorectal carcinomas through chromosomal instability. *Neoplasia* **2014**, *16*, 694-709, doi:10.1016/j.neo.2014.07.011.
27. Jagannathan, M.; Sakwe, A.M.; Nguyen, T.; Frappier, L. The MCM-associated protein MCM-BP is important for human nuclear morphology. *J Cell Sci* **2012**, *125*, 133-143, doi:10.1242/jcs.089938.
28. Kim, H.S.; Park, S.H.; Günzl, A.; Cross, G.A. MCM-BP is required for repression of life-cycle specific genes transcribed by RNA polymerase I in the mammalian infectious form of *Trypanosoma brucei*. *PLoS One* **2013**, *8*, e57001, doi:10.1371/journal.pone.0057001.



- 720 29. Trager, W.; Jensen, J.B. Human malaria parasites in continuous culture. *Science* **1976**,  
721 193, 673-675, doi:10.1126/science.781840.
- 722 30. Armstrong, C.M.; Goldberg, D.E. An FKBP destabilization domain modulates protein  
723 levels in *Plasmodium falciparum*. *Nature Methods* **2007**, 4, 1007-1009,  
724 doi:10.1038/nmeth1132.
- 725 31. Trang, D.T.X.; Huy, N.T.; Kariu, T.; Tajima, K.; Kamei, K. One-step concentration of  
726 malarial parasite-infected red blood cells and removal of contaminating white blood  
727 cells. *Malar J* **2004**, 3, 7-7, doi:10.1186/1475-2875-3-7.
- 728 32. Lambros, C.; Vanderberg, J.P. Synchronization of *Plasmodium falciparum*  
729 erythrocytic stages in culture. *J Parasitol* **1979**, 65, 418-420.
- 730 33. Ribaut, C.; Berry, A.; Chevalley, S.; Reybier, K.; Morlais, I.; Parzy, D.; Nepveu, F.;  
731 Benoit-Vical, F.; Valentin, A. Concentration and purification by magnetic separation  
732 of the erythrocytic stages of all human *Plasmodium* species. *Malar J* **2008**, 7, 45,  
733 doi:10.1186/1475-2875-7-45.
- 734 34. Salmon, B.L.; Oksman, A.; Goldberg, D.E. Malaria parasite exit from the host  
735 erythrocyte: A two-step process requiring extraerythrocytic proteolysis. *Proceedings*  
736 *of the National Academy of Sciences* **2001**, 98, 271-276, doi:10.1073/pnas.98.1.271.
- 737 35. Gambarotto, D.; Hamel, V.; Guichard, P. Ultrastructure expansion microscopy (U-  
738 ExM). *Methods Cell Biol* **2021**, 161, 57-81, doi:10.1016/bs.mcb.2020.05.006.
- 739 36. Liffner, B.; Frölich, S.; Heinemann, G.K.; Liu, B.; Ralph, S.A.; Dixon, M.W.A.;  
740 Gilberger, T.-W.; Wilson, D.W. PfCERLI1 is a conserved rhoptry associated protein  
741 essential for *Plasmodium falciparum* merozoite invasion of erythrocytes. *Nature*  
742 *communications* **2020**, 11, 1411-1411, doi:10.1038/s41467-020-15127-w.
- 743 37. Liffner, B.; Balbin, J.M.; Shami, G.J.; Strauss, J.; Frölich, S.; Heinemann, G.K.;  
744 Alder, A.; Wichers, J.S.; Tilley, L.; Dixon, M.W.A.; et al. *Pfcerli2*, a duplicated gene  
745 in the malaria parasite *Plasmodium falciparum* essential for invasion of erythrocytes  
746 as revealed by phylogenetic and cell biological analysis. *bioRxiv* **2020**,  
747 2020.2011.2026.400549, doi:10.1101/2020.11.26.400549.
- 748 38. Guizetti, J.; Martins, R.M.; Guadagnini, S.; Claes, A.; Scherf, A. Nuclear Pores and  
749 Perinuclear Expression Sites of *var* and Ribosomal DNA Genes Correspond to  
750 Physically Distinct Regions in *Plasmodium falciparum*. *Eukaryotic Cell* **2013**, 12,  
751 697-702, doi:doi:10.1128/EC.00023-13.
- 752 39. Kehrer, J.; Kuss, C.; Andres-Pons, A.; Reustle, A.; Dahan, N.; Devos, D.;  
753 Kudryashev, M.; Beck, M.; Mair, G.R.; Frischknecht, F. Nuclear Pore Complex  
754 Components in the Malaria Parasite *Plasmodium berghei*. *Scientific Reports* **2018**, 8,  
755 11249, doi:10.1038/s41598-018-29590-5.
- 756 40. Dearnley, M.K.; Yeoman, J.A.; Hanssen, E.; Kenny, S.; Turnbull, L.; Whitchurch,  
757 C.B.; Tilley, L.; Dixon, M.W.A. Origin, composition, organization and function of the  
758 inner membrane complex of *Plasmodium falciparum* gametocytes. *Journal of Cell*  
759 *Science* **2012**, 125, 2053-2063, doi:10.1242/jcs.099002.

- 760 41. Grüning, C.; Heiber, A.; Kruse, F.; Ungefehr, J.; Gilberger, T.-W.; Spielmann, T.  
761 Development and host cell modifications of *Plasmodium falciparum* blood stages in  
762 four dimensions. *Nature Communications* **2011**, 2, 165, doi:10.1038/ncomms1169.
- 763 42. Thakur, V.; Asad, M.; Jain, S.; Hossain, M.E.; Gupta, A.; Kaur, I.; Rathore, S.; Ali,  
764 S.; Khan, N.J.; Mohammed, A. Eps15 homology domain containing protein of  
765 *Plasmodium falciparum* (PfEHD) associates with endocytosis and vesicular  
766 trafficking towards neutral lipid storage site. *Biochimica et Biophysica Acta (BBA) -*  
767 *Molecular Cell Research* **2015**, 1853, 2856-2869,  
768 doi:<https://doi.org/10.1016/j.bbamcr.2015.08.007>.
- 769 43. Tran, P.N.; Brown, S.H.J.; Mitchell, T.W.; Matuschewski, K.; McMillan, P.J.; Kirk,  
770 K.; Dixon, M.W.A.; Maier, A.G. A female gametocyte-specific ABC transporter  
771 plays a role in lipid metabolism in the malaria parasite. *Nature Communications* **2014**,  
772 5, 4773, doi:10.1038/ncomms5773.
- 773 44. Tran, P.N.; Brown, S.H.J.; Rug, M.; Ridgway, M.C.; Mitchell, T.W.; Maier, A.G.  
774 Changes in lipid composition during sexual development of the malaria parasite  
775 *Plasmodium falciparum*. *Malar J* **2016**, 15, 73, doi:10.1186/s12936-016-1130-z.
- 776 45. Adisa, A.; Rug, M.; Klonis, N.; Foley, M.; Cowman, A.F.; Tilley, L. The Signal  
777 Sequence of Exported Protein-1 Directs the Green Fluorescent Protein to the  
778 Parasitophorous Vacuole of Transfected Malaria Parasites \*. *Journal of Biological*  
779 *Chemistry* **2003**, 278, 6532-6542, doi:10.1074/jbc.M207039200.
- 780 46. Meibalan, E.; Comunale, M.A.; Lopez, A.M.; Bergman, L.W.; Mehta, A.; Vaidya,  
781 A.B.; Burns, J.M. Host Erythrocyte Environment Influences the Localization of  
782 Exported Protein 2, an Essential Component of the *Plasmodium* Translocon.  
783 *Eukaryotic Cell* **2015**, 14, 371-384, doi:doi:10.1128/EC.00228-14.
- 784 47. Finardi, A.; Massari, L.F.; Visintin, R. Anaphase Bridges: Not All Natural Fibers Are  
785 Healthy. *Genes* **2020**, 11, 902.
- 786 48. Zachos, G. Regulating Cytokinesis. In *Encyclopedia of Cell Biology*, Bradshaw, R.A.,  
787 Stahl, P.D., Eds.; Academic Press: Waltham, 2016; pp. 494-503.
- 788 49. Bannister, L.H.; Hopkins, J.M.; Dluzewski, A.R.; Margos, G.; Williams, I.T.;  
789 Blackman, M.J.; Kocken, C.H.; Thomas, A.W.; Mitchell, G.H. *Plasmodium*  
790 *falciparum* apical membrane antigen 1 (PfAMA-1) is translocated within micronemes  
791 along subpellicular microtubules during merozoite development. *Journal of Cell*  
792 *Science* **2003**, 116, 3825-3834, doi:10.1242/jcs.00665.
- 793 50. Hanssen, E.; Dekiwadia, C.; Riglar, D.T.; Rug, M.; Lemgruber, L.; Cowman, A.F.;  
794 Cyrklaff, M.; Kudryashev, M.; Frischknecht, F.; Baum, J.; et al. Electron tomography  
795 of *Plasmodium falciparum* merozoites reveals core cellular events that underpin  
796 erythrocyte invasion. *Cellular Microbiology* **2013**, 15, 1457-1472,  
797 doi:<https://doi.org/10.1111/cmi.12132>.
- 798 51. Koreny, L.; Zeeshan, M.; Barylyuk, K.; Tromer, E.C.; van Hooff, J.J.E.; Brady, D.;  
799 Ke, H.; Chelaghma, S.; Ferguson, D.J.P.; Eme, L.; et al. Molecular characterization of  
800 the conoid complex in *Toxoplasma* reveals its conservation in all apicomplexans,

including *Plasmodium* species. *PLOS Biology* **2021**, *19*, e3001081, doi:10.1371/journal.pbio.3001081.

52. Bannister, L.H.; Mitchell, G.H.; Butcher, G.A.; Dennis, E.D. Lamellar membranes associated with rhoptries in erythrocytic merozoites of *Plasmodium knowlesi*: a clue to the mechanism of invasion. *Parasitology* **1986**, *92*, 291-303, doi:10.1017/S0031182000064064.
53. Liffner, B.; Balbin, J.M.; Wichers, J.S.; Gilberger, T.-W.; Wilson, D.W. The Ins and Outs of *Plasmodium* Rhoptries, Focusing on the Cytosolic Side. *Trends in Parasitology* **2021**, *37*, 638-650, doi:10.1016/j.pt.2021.03.006.
54. Sakwe, A.M.; Nguyen, T.; Athanasopoulos, V.; Shire, K.; Frappier, L. Identification and characterization of a novel component of the human minichromosome maintenance complex. *Mol Cell Biol* **2007**, *27*, 3044-3055, doi:10.1128/mcb.02384-06.
55. Nishiyama, A.; Frappier, L.; Méchali, M. MCM-BP regulates unloading of the MCM2-7 helicase in late S phase. *Genes Dev* **2011**, *25*, 165-175, doi:10.1101/gad.614411.
56. Takahashi, N.; Quimbaya, M.; Schubert, V.; Lammens, T.; Vandepoele, K.; Schubert, I.; Matsui, M.; Inzé, D.; Berx, G.; De Veylder, L. The MCM-binding protein ETG1 aids sister chromatid cohesion required for postreplicative homologous recombination repair. *PLoS Genet* **2010**, *6*, e1000817, doi:10.1371/journal.pgen.1000817.
57. Stray, J.E.; Lindsley, J.E. Biochemical analysis of the yeast condensin Smc2/4 complex: an ATPase that promotes knotting of circular DNA. *J Biol Chem* **2003**, *278*, 26238-26248, doi:10.1074/jbc.M302699200.
58. Wang, H.; Liu, Y.; Yuan, J.; Zhang, J.; Han, F. The condensin subunits SMC2 and SMC4 interact for correct condensation and segregation of mitotic maize chromosomes. *Plant J* **2020**, *102*, 467-479, doi:10.1111/tpj.14639.
59. Pandey, R.; Abel, S.; Boucher, M.; Wall, R.J.; Zeeshan, M.; Rea, E.; Freville, A.; Lu, X.M.; Brady, D.; Daniel, E.; et al. *Plasmodium* Condensin Core Subunits SMC2/SMC4 Mediate Atypical Mitosis and Are Essential for Parasite Proliferation and Transmission. *Cell Reports* **2020**, *30*, 1883-1897.e1886, doi:<https://doi.org/10.1016/j.celrep.2020.01.033>.
60. Strunnikov, A.V.; Hogan, E.; Koshland, D. SMC2, a *Saccharomyces cerevisiae* gene essential for chromosome segregation and condensation, defines a subgroup within the SMC family. *Genes & Development* **1995**, *9*, 587-599, doi:10.1101/gad.9.5.587.
61. Steffensen, S.; Coelho, P.A.; Cobbe, N.; Vass, S.; Costa, M.; Hassan, B.; Prokopenko, S.N.; Bellen, H.; Heck, M.M.S.; Sunkel, C.E. A role for *Drosophila* SMC4 in the resolution of sister chromatids in mitosis. *Current Biology* **2001**, *11*, 295-307, doi:10.1016/S0960-9822(01)00096-3.
62. Hong, Y.; Sonnevile, R.; Wang, B.; Scheidt, V.; Meier, B.; Woglar, A.; Demetriou, S.; Labib, K.; Jantsch, V.; Gartner, A. LEM-3 is a midbody-tethered DNA nuclease

that resolves chromatin bridges during late mitosis. *Nature Communications* **2018**, *9*, 728, doi:10.1038/s41467-018-03135-w.

63. Zhang, M.; Wang, C.; Otto, T.D.; Oberstaller, J.; Liao, X.; Adapa, S.R.; Udenze, K.; Bronner, I.F.; Casandra, D.; Mayho, M.; et al. Uncovering the essential genes of the human malaria parasite *Plasmodium falciparum* by saturation mutagenesis. *Science* **2018**, *360*, eaap7847, doi:doi:10.1126/science.aap7847.

64. Bushell, E.; Gomes, A.R.; Sanderson, T.; Anar, B.; Girling, G.; Herd, C.; Metcalf, T.; Modrzynska, K.; Schwach, F.; Martin, R.E.; et al. Functional Profiling of a *Plasmodium* Genome Reveals an Abundance of Essential Genes. *Cell* **2017**, *170*, 260-272.e268, doi:10.1016/j.cell.2017.06.030.

65. Canning, E.U.; Sinden, R.E. The organization of the ookinete and observations on nuclear division in oocysts of *Plasmodium berghei*. *Parasitology* **1973**, *67*, 29-40, doi:10.1017/S0031182000046266.
