13

## ABSTRACT

14           The malaria parasite *Plasmodium falciparum* undergoes closed mitosis, which occurs  
15 *within an intact nuclear envelope, and* differs significantly from its human host. Mitosis is  
16 underpinned by the dynamics of microtubules and the nuclear envelope. To date, our ability to  
17 study *P. falciparum* mitosis by microscopy has been hindered by the small size of *P. falciparum*  
18 nuclei. Ultrastructure expansion microscopy (U-ExM) has recently been developed for *P.*  
19 *falciparum*, allowing visualization of mitosis at the individual nucleus level. Using U-ExM,  
20 three intranuclear microtubule structures are observed: hemispindles, mitotic spindles and  
21 interpolar spindles. A previous study demonstrated that the mini-chromosome maintenance  
22 complex binding-protein (MCMBP) depletion caused abnormal nuclear morphology and  
23 microtubule defects. To investigate the role of microtubules following MCMBP depletion and  
24 study the nuclear envelope in these parasites, we developed the first nuclear stain enabled by  
25 U-ExM in *P. falciparum*. MCMBP deficient parasites show aberrant hemispindles and mitotic  
26 spindles. Moreover, anaphase chromatin bridges, and individual nuclei containing multiple  
27 microtubule structures were observed following MCMBP knockdown. Collectively, this study  
28 refines our understanding of MCMBP-deficient parasites and highlights the utility of U-ExM  
29 coupled with a nuclear envelope stain for studying mitosis in *P. falciparum*.

30

## INTRODUCTION

31 Malaria is estimated cause over 400,000 deaths annually, these deaths are  
32 predominantly in young children and are caused by the unicellular protozoan pathogen  
33 *Plasmodium falciparum* [1]. Resistance against frontline antimalarials has emerged in many  
34 parts of the globe and is spreading [2-6]. Moreover, there is no highly effective vaccine against  
35 malaria, highlighting the need to develop new therapeutic interventions for ongoing and future  
36 control of this disease. One therapeutic strategy is drug inhibition of DNA/RNA replication,  
37 and/or cell division, a method that is commonly used for control of bacterial [7] and viral  
38 diseases [8], along with many types of cancer [9]. The distinctive division method of *P.*  
39 *falciparum* compared to its human host makes this an attractive strategy for *P. falciparum* drug  
40 design, yet no current antimalarials directly target DNA replication or cell division [10];  
41 highlighting the need for further investigation into this pathway.

42 *Plasmodium* parasites undergo cell division by a process known as schizogony, whereby  
43 a singly nucleated parasite undergoes repeated rounds of DNA replication and mitosis, within  
44 a shared cytoplasm, followed by a single cytokinetic event that results in the formation of 16-  
45 32 daughter parasites [11-13]. Throughout division, *Plasmodium* undergoes closed mitosis,  
46 where the nuclear envelope remains intact, as opposed to the open mitosis of its human host  
47 [14]. Nuclear division during schizogony is orchestrated by a set of intranuclear microtubule  
48 structures, which appear to be unique to *Plasmodium* [15,16]. The first observed microtubule  
49 structure during the blood-stage of the lifecycle is the hemispindle, a collection of ~5  
50 microtubule branches that extend from a single microtubule organizing center (MTOC)  
51 throughout the nucleus [15-17]. It has been shown that during the first mitosis, the hemispindle  
52 retracts, the MTOC duplicates, and the mitotic spindle is formed [16]. Mitotic spindles consist  
53 of short microtubules that extend from two opposing MTOCs and connect to the kinetochore,  
54 in preparation for chromatid separation into daughter nuclei [15,16,18-21]. Following chromatid

55 separation, two distinct and distant DNA masses are observed, each containing their own  
56 MTOC, but connected by extended microtubules that are attached to both MTOCs [16]. The  
57 nomenclature around this microtubule structure is inconsistent, having previously been named  
58 astral microtubules [14], complete hemispindles [15], and extended spindles [16], but in this  
59 study they will be referred to as interpolar spindles as their defining feature is connecting two  
60 distant MTOCs. Following nuclear segregation, the interpolar spindle retracts and the two  
61 daughter nuclei undergo nuclei fission before reforming the hemispindle [16].

62 Mitosis in *Plasmodium* has been poorly studied historically. This is due to the small size  
63 of *P. falciparum* nuclei (~1  $\mu\text{m}$  diameter), which largely prevents visualization of events  
64 occurring at a single-nucleus level by conventional microscopy techniques. Technological  
65 advancements that overcome the resolution hurdle, along with recent work on other organisms  
66 that undergo closed mitosis, have reignited interest in closed mitosis broadly and of  
67 *Plasmodium* mitosis specifically. The application of Ultrastructural-expansion microscopy (U-  
68 ExM), a sample preparation method that isotropically expands the sample ~4.5x, to *P.*  
69 *falciparum* [22] has radically enhanced our ability to study the biology occurring inside  
70 individual nuclei. Indeed U-ExM has already been used to observe microtubules in asexual  
71 blood-stages, ookinetes and gametocytes [16,22,23]. Moreover, U-ExM has been used to  
72 differentiate the intranuclear microtubules of *P. falciparum*, providing significance insight into  
73 the physiology of microtubule dynamics in the process [16,22]. Outside of *Plasmodium*, a recent  
74 study on the genetically tractable and much larger fission yeast that undergoes closed mitosis,  
75 *Schizosaccharomyces pombe*, provided mechanistic insight into this fascinating process, with  
76 a particular focus on the relationship between closed mitosis and nuclear envelope dynamics  
77 [24]. With the application of U-ExM to *P. falciparum*, we can now begin to study the closed  
78 mitosis of *Plasmodium* with a resolving power similar to fission yeast, the most well studied  
79 model organism for closed mitosis. Notably, however, the absence of a uniform marker for the

80 nuclear envelope in *Plasmodium* largely precludes understanding of the role of the nuclear  
81 envelope in closed mitosis.

82 Studies on *Plasmodium* microtubules historically have been largely descriptive and  
83 relatively few individual proteins are known to influence microtubule dynamics. One protein  
84 that has previously been shown to be involved in *P. falciparum* microtubule organization is the  
85 mini-chromosome maintenance binding protein (MCMBP) [25]. In other organisms, MCMBP  
86 is directly involved in DNA replication, with disruption or alteration in its expression leading  
87 to defects in DNA replication and nuclear morphology, and leading to MTOC amplification  
88 [26-28]. In a recent study, the authors generated a transgenic parasite line for inducible  
89 knockdown where the destabilization domain system was incorporated into MCMBP  
90 (MCMBP<sup>HADD</sup>) [25]. Using this system, the addition of a molecule called Shield-1 (Shld1)  
91 results in wildtype expression of MCMBP, while the absence of Shld1 results in specific  
92 MCMBP knockdown. MCMBP deficient parasites were able to undergo DNA replication, but  
93 showed severe microtubule defects and aneuploidy; attributed to defective DNA segregation  
94 [25]. Given then canonical role of MCMBP in DNA replication, it is likely that the microtubule  
95 defects observed are downstream, rather than direct, effects of MCMBP depletion. Importantly,  
96 while this work was performed with state-of-the-art Airyscan microscopy at the time of  
97 publication, they were unable to visualize several important facets of mitosis and microtubules  
98 in MCMBP-deficient parasites due to the resolution limit of this techniques. Notably, the  
99 limited resolution meant it could not be determined whether aberrant microtubules represented  
100 hemispindles or interpolar spindles. Additionally, the absence of a nuclear envelope marker  
101 meant that it could not be determined whether microtubule structures were present in the  
102 shared, or separate, nuclei.

103 Here, we use U-ExM to study spatial organization of intranuclear microtubules and  
104 nuclear division in the context of MCMBP deficient parasites. While the effects of MCMBP

105 knockdown on microtubules are likely downstream of MCMBP function, *Plasmodium*  
106 continues DNA replication even the presence of these defects due to a lack of canonical cell  
107 cycle checkpoints [29]. This provides the unique ability to study the ongoing impact of both  
108 MCMBP knockdown, and microtubule dysregulation in parasite mitosis. Additionally, we  
109 develop the first U-ExM compatible nuclear envelope stain. We use U-ExM to show that  
110 MCMBP deficient parasites display defective hemispindles and mitotic spindles. Additionally,  
111 we couple U-ExM and nuclear envelope staining to show that MCMBP deficient parasites form  
112 anaphase chromatin bridges, which leads to aneuploidy and the presence of multiple  
113 microtubule structures contained within the same nuclear envelope.

## 114 METHODS

### 115 *Plasmodium falciparum* culture

116 All parasites used in this study were the previously generated transgenic parasite line  
117 3D7-PfMCMBP<sup>3HADD</sup> [25]. For routine culture parasites were grown in O<sup>+</sup> human red blood  
118 cells at hematocrit of 4% in RPMI-1640 supplemented with 50 mg/L hypoxanthine, 25 mM  
119 HEPES, 0.5% w/v Albumax II and incubated in a mixture of 1% O<sub>2</sub>, 5 % CO<sub>2</sub> and 94 % N<sub>2</sub> as  
120 previously described [30]. Additionally, to prevent degradation of MCMBP through the  
121 destabilization domain system, parasites were cultured in the presence of 250 nM Shield-1 as  
122 previously described [25,31].

123 Parasites were tightly synchronized using a combination of Percoll concentration and  
124 sorbitol lysis. Briefly, schizont-stage cultures were resuspended in 60 % Percoll and separated  
125 from uninfected red blood cells by centrifugation as previously described [32]. Concentrated  
126 schizonts were then allowed to reinvade new red blood cells for ~3 hours under normal culture

127 conditions. Following reinvasion, parasite cultures were resuspended in 5% w/v D-sorbitol to  
128 selectively lyse schizonts that had not reinvaded, as previously described [33].

129 For assays requiring knockdown of MCMBP, and therefore washout of Shield-1,  
130 synchronized schizont-stage cultures (~44-46 h.p.i.) were separated from uninfected red blood  
131 cell using QuadroMACS<sup>®</sup> magnet activated cell sorting [34]. Parasites were allowed to reinvade  
132 in the absence of Shield-1 for ~3 hours before being synchronized with sorbitol. As it has been  
133 previously shown that knockdown of MCMBP delays parasite growth by approximately three  
134 hours [25], parasites grown in the absence of Shield-1 were always collected three hours after  
135 those grown in the presence of Shield-1.

136 For assays where segmented schizonts were harvested, schizont-stage cultures (~44  
137 h.p.i.) were treated with the schizont egress inhibitor [35] trans-Epoxy succinyl-L-  
138 leucylamido(4-guanidino)butane (E64) at 10  $\mu$ M for ~5 hours.

### 139 **Immunofluorescence assays**

140 Immunofluorescence assays in this study were adapted from previously published  
141 protocols [17,25]. Briefly, for immunofluorescence assays of unexpanded parasites, ~1 mL of  
142 parasite culture at 2% hematocrit was centrifuged at 2,000 rpm in a benchtop centrifuge, the  
143 supernatant removed, and the culture resuspended in 4 % w/v paraformaldehyde-PBS before  
144 incubating at room temperature for 10 minutes. Fixed parasite cultures were again centrifuged  
145 at 2,000 rpm, with the fixative removed and ~3  $\mu$ L of packed red blood cell pellet smeared  
146 onto a glass slide and dried. Dried smears were washed three times in PBS before being  
147 permeabilized with 0.1 % v/v Triton-X-100 for 10 minutes at room temperature. Following  
148 permabilization, smears were washed three times in PBS and blocked in 3 % w/v bovine serum  
149 albumin in PBS for 60 minutes at room temperature. After blocking, smears were incubated  
150 with primary antibodies diluted in blocking solution for one hour at room temperature,

151 followed by three washes in PBS. Slides were then incubated with secondary antibodies and  
152 NHS ester diluted in PBS for one hour at room temperature. Following antibody staining, slides  
153 were washed three times in PBS, dried, mounted with ProLong™ Glass with NucBlue™  
154 (ThermoFisher Cat. No. P36981) and a #1.5 coverslip placed on top of the smear.

## 155 **Ultrastructure Expansion Microscopy**

156 Ultrastructure Expansion Microscopy (U-ExM) was performed as previously described  
157 [16,22,36], with significant modification.

158 12 mm round coverslips (Fisher Cat. No. NC1129240) were treated with poly-D-lysine  
159 for 1 hour at 37 °C, washed twice with MilliQ water, and placed in the wells of a 12-well plate.  
160 Parasite cultures were set to 0.5 % hematocrit, and 1 mL of parasite culture was allowed to  
161 settle onto the coverslip for 15 minutes at 37 °C. Culture supernatants were removed, and  
162 cultures were fixed with 1 mL of 4% w/v PFA/PBS for 15 minutes at 37 °C. Following fixation,  
163 coverslips were washed three times with PBS pre-warmed to 37 °C before being treated with  
164 1 mL of 1.4 % v/v formaldehyde / 2% v/v acrylamide (FA/AA) in PBS. After addition of the  
165 FA/AA solution, the 12 well plate was parafilm shut and left to incubate at 37 °C overnight.

166 Monomer solution (19 % w/w sodium acrylate (Sigma Cat. No. 408220), 10% v/v  
167 acrylamide (Sigma Cat. No. A4058), 2 % v/v N,N'-methylolenebisacrylamide (Sigma Cat. No.  
168 M1533) in PBS) was made in 1 mL batches on Day 1 and stored as 90 µL aliquots at -20 °C  
169 overnight.

170 10 % v/v tetraethylenediamine (TEMED; ThermoFisher Cat. No. 17919) and 10 % w/v  
171 ammonium persulfate (APS; ThermoFisher Cat. No. 17874) aliquots were thawed on ice, while  
172 a humidity chamber containing parafilm was stored at -20 °C before also being placed on ice.  
173 FA/AA solution was removed, coverslips were washed once with PBS, dried, and placed cell-



174 side up on the parafilm in the humidity chamber. 5  $\mu$ L of both TEMED and APS were added  
175 per 90  $\mu$ L of monomer solution, which was briefly vortexed, and 35  $\mu$ L pipetted onto the  
176 parafilm before the coverslip was placed cell-side down onto the monomer solution. Gels were  
177 then incubated at 37 °C for 1 hour before being transferred into the wells of a 6-well plate filled  
178 with denaturation buffer for 15 minutes at room temperature (200 mM sodium dodecyl sulfate  
179 (SDS), 200 mM NaCl, 50 mM Tris, pH 9). Gels were then separated from coverslips and  
180 transferred into Eppendorf tubes containing denaturation buffer and denatured at 95 °C for 90  
181 minutes. Denatured gels were transferred into 10 cm Petri dishes filled with 25 mL MilliQ  
182 water and placed on platform shaker for 30 minutes, with the water replaced twice, each for a  
183 further 30 minutes. After the first expansion in water, expanded gels were shrunk by adding 25  
184 mL two PBS washes each for 15 minutes. Shrunken gels were placed into the wells of a 6-well  
185 plate filled with blocking buffer (3% BSA-PBS) and blocked for 1 hour at room temperature  
186 on a platform shaker. After blocking, primary antibodies were prepared in 1 mL of blocking  
187 buffer and gels were incubated with primary antibody overnight at room temperature on a  
188 platform shaker.

189 Gels were washed three times in 0.5 % v/v PBS-Tween 20 (PBS-T), each for 10  
190 minutes, before being incubated with 1 mL of secondary antibodies, NHS ester and/or nuclear  
191 stain diluted in PBS for 2.5 hours at room temperature on a platform shaker. Following  
192 secondary incubation, gels were washed three times in PBS-T. Stained gels were then  
193 transferred back to 10 cm Petri dishes and underwent a second round of expansion with three  
194 30 minutes washes in 25 mL MilliQ water.

195 The diameter of fully expanded gels was measured using a tape measure and the  
196 expansion factor determined by dividing the expanded gel size (in mm) by the initial coverslip  
197 size (12mm). Gel diameter and expansion factor for all gels prepared in this study can be found  
198 Supplementary Figure 1.

199 For gels stained with BODIPY TR Ceramide (BODIPY TRc), sections of the expanded  
200 gel were cut and placed into the wells of a 6-well plate containing 1 mL 2  $\mu$ M BODIPY TRc  
201 in MilliQ and incubated on a platform shaker overnight.

202 To prepare gels for imaging, small sections were cut from the larger gel and gently dried before  
203 being placed into 35 mm #1.5 coverslip bottomed imaging dishes (Cellvis; Fisher Cat. No.  
204 NC0409658) that had been pre-coated with poly-D-lysine.

### 205 **Stains and antibodies**

206 The following primary antibodies were used in this study: Mouse IgG1 anti-alpha  
207 Tubulin Clone B-5-1-2; ThermoFisher cat. No. 32-2500 (1:1000 unexpanded samples, 1:500  
208 U-ExM samples), Mouse IgG2a anti-Centrin-1 Clone 20H5; EMD Millipore cat. No. 04-1624  
209 (1:100 U-ExM samples), Rabbit polyclonal anti-PfBiP; generously provided by Dr. Jeff Dvorin  
210 (1:500 U-ExM samples).

211 The following secondary antibodies were used in this study: Goat anti-mouse IgG  
212 Alexa Fluor 488 Superclonal™; ThermoFisher Cat. No. A28175 (1:1000 unexpanded samples,  
213 1:500 U-ExM samples), Goat anti-mouse IgG2a Alexa Fluor 488 Cross-Adsorbed;  
214 ThermoFisher Cat. No. A21131 (1:500 U-ExM samples), Goat anti-mouse IgG1 Alexa Fluor  
215 594 Cross-Adsorbed; ThermoFisher Cat. No. A21125 (1:500 U-ExM samples), Goat anti-  
216 mouse IgG1 Alexa Fluor 647 Cross-Adsorbed; ThermoFisher Cat. No. A21240 (1:500 U-ExM  
217 samples), Goat anti-rabbit Alexa Fluor 488 Highly Cross-Adsorbed; ThermoFisher Cat. No.  
218 A11034 (1:500 U-ExM samples).

219 The following stains were used in this study: NucBlue™/Hoechst 33342 (in ProLong  
220 Glass™ mountant), DAPI (2  $\mu$ g/mL U-ExM samples), NHS Ester Atto 594 in DMSO; Sigma  
221 Cat. No. 08741 (10  $\mu$ g/mL unexpanded samples. 10  $\mu$ g/mL U-ExM samples), NHS Ester Alexa

222 Fluor 405 in DMSO; ThermoFisher Cat. No. A30000 (8  $\mu\text{g}/\text{mL}$  U-ExM samples), DRAQ5™;  
223 ThermoFisher Cat. No. 62251 (20  $\mu\text{M}$  U-ExM samples), SYTOX™ Deep Red; ThermoFisher  
224 Cat. No. S11381 (1  $\mu\text{M}$  U-ExM samples), BODIPY TR Ceramide in DMSO; ThermoFisher  
225 Cat. No. D7540 (2  $\mu\text{M}$  U-ExM samples).

226 A comprehensive list of all primary antibodies, secondary antibodies, and stains used  
227 for each of the images presented in this study can be found in Supplementary Table 1.

## 228 **Image acquisition**

229 All microscopy presented in this study was performed on a Zeiss LSM800  
230 AxioObserver microscope that had an Airyscan detector. Additionally, all images were  
231 acquired using a 63x Plan-Apochromat (NA 1.4) objective lens. All images presented in this  
232 study were acquired as Z-stacks with an XY pixel size of 0.035  $\mu\text{m}$  and a Z-step size of 0.15  
233  $\mu\text{m}$ . All images then underwent Airyscan processing using ZEN Blue (Version 3.1).

## 234 **Image analysis**

235 All image analysis performed in this study used ZEN Blue (Version 3.1). All  
236 measurements of length were made using the “profile” function of ZEN Blue.

237 To measure hemispindle branch length, maximum intensity projections were made of  
238 Airyscan-processed images. Hemispindle branches were first counted and then were measured  
239 from the edge of the tubulin staining closest to the MTOC (visible on the NHS Ester channel)  
240 to the edge of the tubulin staining furthest away from the MTOC. Nuclei that contained both  
241 hemispindles and interpolar spindles were excluded from this analysis. In nuclei that contained  
242 multiple MTOCs, it could not always be determined which MTOC each branch was coming  
243 from, and so these nuclei were excluded from this analysis.

244 To measure mitotic spindle length, maximum intensity projections were made of  
245 Airyscan-processed images. Mitotic spindle size was measured as the greatest distance between  
246 the edge of the tubulin staining that was adjacent to each of the two MTOCs.

## 247 **Statistical analyses**

248 This study reports both the measured distances of mitotic and hemispindles, and then  
249 estimated actual distances in unexpanded parasites. To estimate actual distances, the mean  
250 expansion factor of all gels used in this study was determined (4.3x; Supplementary Figure 1c).  
251 All actual distances were then divided by this mean expansion factor to get the actual estimated  
252 distances reported in this study.

253 All graphs and statistical analyses in this study were performed and generated using  
254 GraphPad PRISM 9. All values of statistical significance in this study were determined using  
255 an unpaired, two-tailed T-test.

## 256 **RESULTS**

### 257 **Ultrastructure expansion microscopy (U-ExM) significantly enhances visualization of** 258 **microtubule structures in *P. falciparum***

259 To validate the utility of U-ExM for visualizing microtubules in *P. falciparum*, we first  
260 confirmed that we could visualize all previously identified microtubule structures  
261 (hemispindle, mitotic spindle, interpolar spindle, subpellicular microtubules) in unexpanded  
262 parasites (Figure 1a). Additionally, we incorporated a general protein stain (N-  
263 hydroxysuccinimide (NHS) ester). In unexpanded parasites NHS ester staining did not produce  
264 a staining pattern that obviously represented a particular organelle. Despite no obvious  
265 demarcation of organelles, NHS ester staining appeared slightly denser in the chromatin-free

266 region of the nucleus (Figure 1a), which has previously been shown to contain the microtubule  
267 organizing center (MTOC) [16]. Additionally, in segmented schizonts NHS ester staining  
268 appeared denser at the apical tip of merozoites, likely corresponding to the merozoite secretory  
269 organelles rhoptries, micronemes, or dense granules (Figure 1a).

270 Despite its unclear staining in unexpanded parasites, U-ExM parasites stained with  
271 NHS ester allowed the identification of many intracellular structures that were not recognizable  
272 in unexpanded parasites. Through differences in staining intensity, the location of the red blood  
273 cell (RBC) membrane, parasite vacuole membrane (PVM) and parasite plasma membrane  
274 (PPM) could all be inferred (Figure 1b & c). Prior to segmentation, the MTOC can be clearly  
275 identified based on NHS staining, and it roughly adopts a ‘bell-shape’ with the most intense  
276 NHS ester staining at the top of the bell, and least at the bottom. Additionally, comparing NHS  
277 ester staining and DNA staining it can be seen that there is a density of NHS ester on the nuclear  
278 side of the MTOC that does not contain chromatin; which likely represents a recently identified  
279 chromatin-free nuclear compartment adjacent to the MTOC [16]. In fully segmented schizonts,  
280 the MTOC is no longer visible by NHS ester staining but instead we see the characteristic  
281 double-club-shaped rhoptries stained prominently (Figure 1b & c). At the apex of the rhoptry  
282 neck a ring structure can be observed (Figure 1b & c), which we inferred to be the apical polar  
283 rings based on its similar appearance to the apical polar rings in electron microscopy studies  
284 [37]. It is not clear if what we observe by NHS ester staining represents apical polar ring 1,  
285 apical polar ring 2, or both. At the basal end of the parasite, we observed another ring by NHS  
286 ester staining that is likely the basal complex (Figure 1b & c) based on its similarity to the basal  
287 complex as identified by FIB-SEM [12]. By combining NHS Ester and tubulin staining, we  
288 observed that subpellicular microtubules extend from the apical polar rings, along the length  
289 of the merozoite and end at the basal complex (Figure 1b & c). While previously published  
290 models of merozoites have speculated on this organization previously [38], to the best of our

291 knowledge, this is the first time the apical polar rings, subpellicular microtubules, and basal  
 292 complex have been observed in the same merozoite.

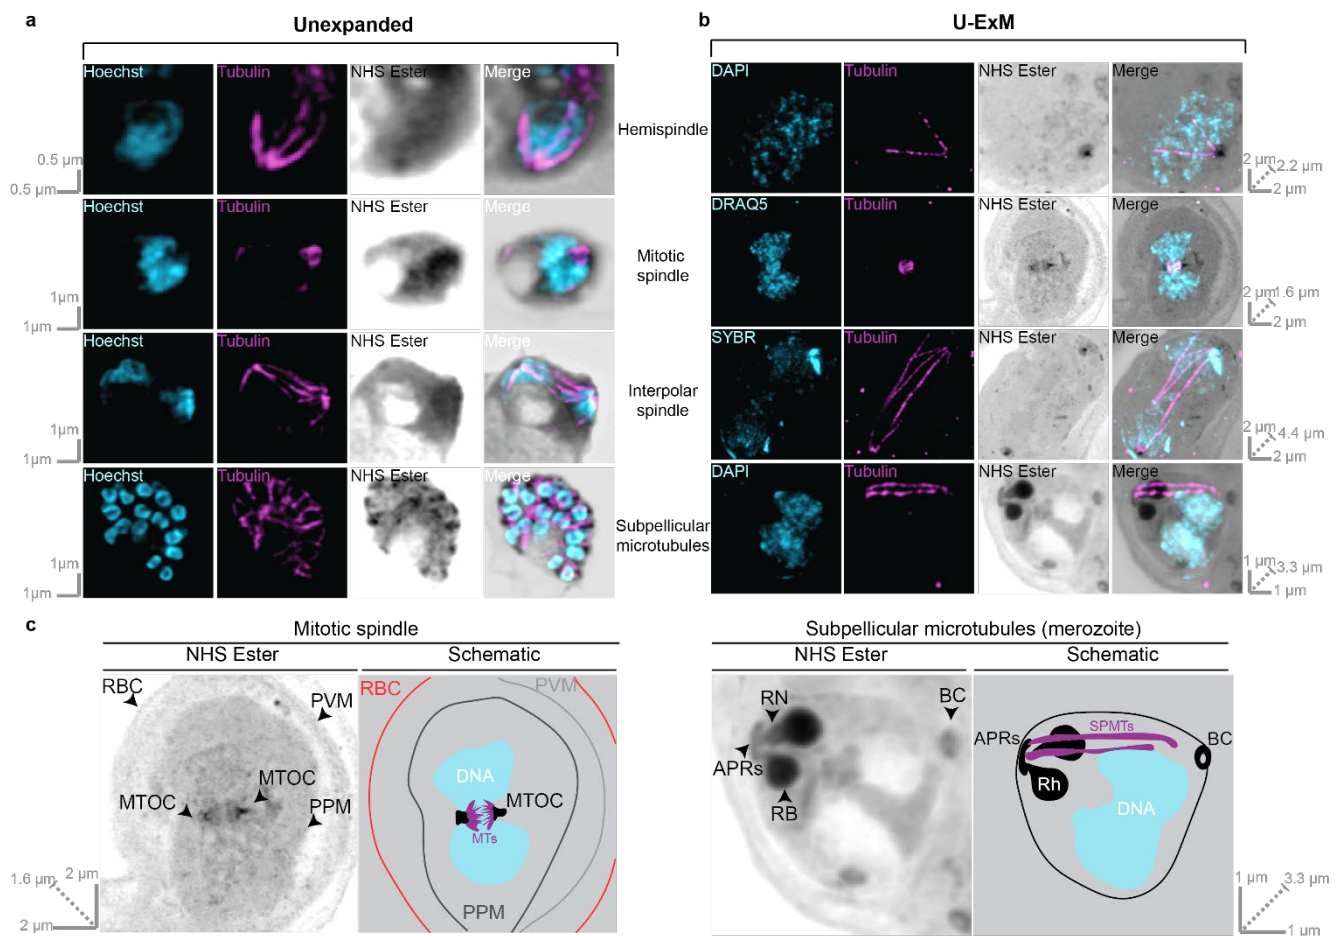

293 **Figure 1. Comparison between microtubule structures visualized in unexpanded and U-ExM *P. falciparum***  
 294 **asexual blood-stage parasites.**

295 *MCMBP<sup>HADD</sup>* parasites, cultured in the presence of *Shld1*, were imaged using super-resolution Airyscan  
 296 microscopy after being prepared for regular immunofluorescence assay (a), or U-ExM (b). All parasites were  
 297 stained with a nuclear stain (Hoechst, DAPI, DRAQ5, or SYBR in cyan), anti-tubulin (in magenta) and a protein  
 298 stain (N-hydroxysuccinimide (NHS) Ester in greyscale). All previously identified blood-stage microtubule  
 299 structures (hemispindle, mitotic spindle, interpolar spindle and subpellicular microtubules) were observed by  
 300 both IFA and U-ExM. Images in (a) represent a single z-slice from a z-stack image, while images in (b) are  
 301 maximum-intensity projections. Slice-by-slice videos of images in 1b found in Supplementary Videos 1-4. Scale  
 302 bars as labelled in each image, solid bars = XY scale, dashed bar = combined depth of slices used for Z-  
 303 projection. (c) Expanded and annotated view of NHS Ester channel from mitotic spindle and subpellicular  
 304 microtubule images from (b) along with schematic interpretation of these images. Arrowheads point to NHS  
 305 staining of interest. Colors in schematic: black = dense NHS Ester staining, grey = light NHS Ester staining, blue  
 306 = DNA, purple = microtubules. RBC = Red blood cell membrane, PVM = Parasitophorous vacuole membrane,  
 307 PPM = Parasite plasma membrane, MTOC = Microtubule organizing center, MTs = microtubules, APRs =  
 308 Apical polar rings, RN = Rhoptry neck, RB = Rhoptry bulb, BC = Basal complex, Rh = rhoptry, SPMTs =  
 309 Subpellicular microtubules.

310 All microtubule structures were also observed following U-ExM but could be observed  
 311 in far greater detail with less confounding complexity from neighboring nuclei (Figure 1b).



312 Notably, all the branches of a hemispindle could be readily differentiated including many small  
313 branches that previously would have been below the limit of detection (Figure 1b, Figure  
314 2a&b) (Supplementary Figure 3). In mitotic spindles both sides of the spindle, connected to  
315 either MTOC, could be differentiated and the individual branches that would connect to the  
316 kinetochore during mitosis could be observed (Figure 1b). Interpolar spindles were observed  
317 connecting two distant MTOCs (Figure 1b). Additionally, these interpolar spindles were found  
318 alongside microtubules that extended most of the way to the other MTOC but not completely,  
319 and branches that resembled those in a hemispindle (Figure 1b). In merozoites from segmented  
320 schizonts, subpellicular microtubules were observed, with typically 2-4 individual  
321 microtubules in each merozoite (Figure 1b & c). Collectively, this shows that U-ExM, coupled  
322 with NHS ester staining, can be used to visualize *P. falciparum* microtubules at a single-  
323 nucleus level.

#### 324 **MCMBP deficient parasites display aberrant hemispindles and mitotic spindles.**

325 It has previously been observed that MCMBP deficient parasites display microtubule  
326 defects [25], but the resolution limit of conventional light microscopy prevented exploration of  
327 the nature of these defects. Given that each of the microtubule structures could be distinguished  
328 from each other using U-ExM (Figure 1b), we used this technique to study microtubule  
329 formation in MCMBP deficient parasites.

330 MCMBP<sup>HADD</sup> parasites either in the presence or absence of Shld1 were stained with  
331 antibodies against tubulin and centrin, a nuclear stain, and NHS ester. All images were acquired  
332 using Airyscan microscopy after U-ExM. In both hemispindles and mitotic spindles, centrin  
333 staining colocalized with the previously described ‘bell-shape’ of the MTOC observed on NHS  
334 ester staining (Figure 2a & e) (Supplementary Figures 3 & 4). Notably, however, centrin  
335 staining did not colocalize with the entirety of the MTOC, with centrin foci contained within a

336 small portion of the whole MTOC. By comparing with the nuclear stain, it could be seen that  
337 centrin foci localized towards the cytoplasmic side of the MTOC structure, suggesting that *P.*  
338 *falciparum* may compartmentalize subsets of proteins inside the MTOC.

339 In MCMBP deficient parasites, MTOC staining often appeared aberrant with misplaced  
340 centrin foci (Figure 2e) (Supplementary Figures 3 & 4). However, these defects were not  
341 consistent or easily quantifiable by regular microscopy measurement techniques. The nature of  
342 these defects is unclear but suggest that MCMBP knockdown may alter the formation or  
343 integrity of the MTOC.

344 In the presence of Shld1 (Figure 2a), hemispindle branches were on average 732 nm in  
345 length ( $\pm 498$  nm SD) (Figure 2b), with the longest branch in each hemispindle being 1260 nm  
346 ( $\pm 512$  nm SD) (Figure 2c), and each hemispindle containing 5 branches ( $\pm 2.2$  SD) (Figure 2d).  
347 In the absence of Shld1 (Figure 2a), hemispindle branches were on average 31.4 % longer  
348 (1067 nm  $\pm 815$  nm SD) (Figure 2b), with the longest branch in each hemispindle being 32.5  
349 % longer (1866 nm  $\pm 936$  nm SD) (Figure 2c), and each hemispindle containing 18.3 % more  
350 branches (6.2 branches  $\pm 2.8$  SD) (Figure 2d). This suggests that control of hemispindle branch  
351 length and number is altered in MCMBP deficient parasites.

352 Mitotic spindles from parasites cultured either in the presence or absence of Shld1 were  
353 also imaged and measured (Figure 2e) (Supplementary Figure 4). In the presence of Shld1,  
354 mitotic spindles form in an orderly fashion with branches that extend from each of the MTOC  
355 towards the opposing MTOC and meet near the middle. By contrast, in the absence of Shld1,  
356 branches from the mitotic spindle appeared more heterogeneous in length, but do not appear to  
357 extend towards the other MTOC or meet near the middle of the two MTOCs. Moreover, mitotic  
358 spindles were 23% larger in the absence of Shld1 (691 nm  $\pm 202$  nm SD) than in the presence  
359 of Shld1 (529 nm  $\pm 76$  nm SD) (Figure 2f). This suggests that MCMBP deficient parasites



360 form larger mitotic spindles, where the organization and positioning of spindle branches is  
 361 aberrant.

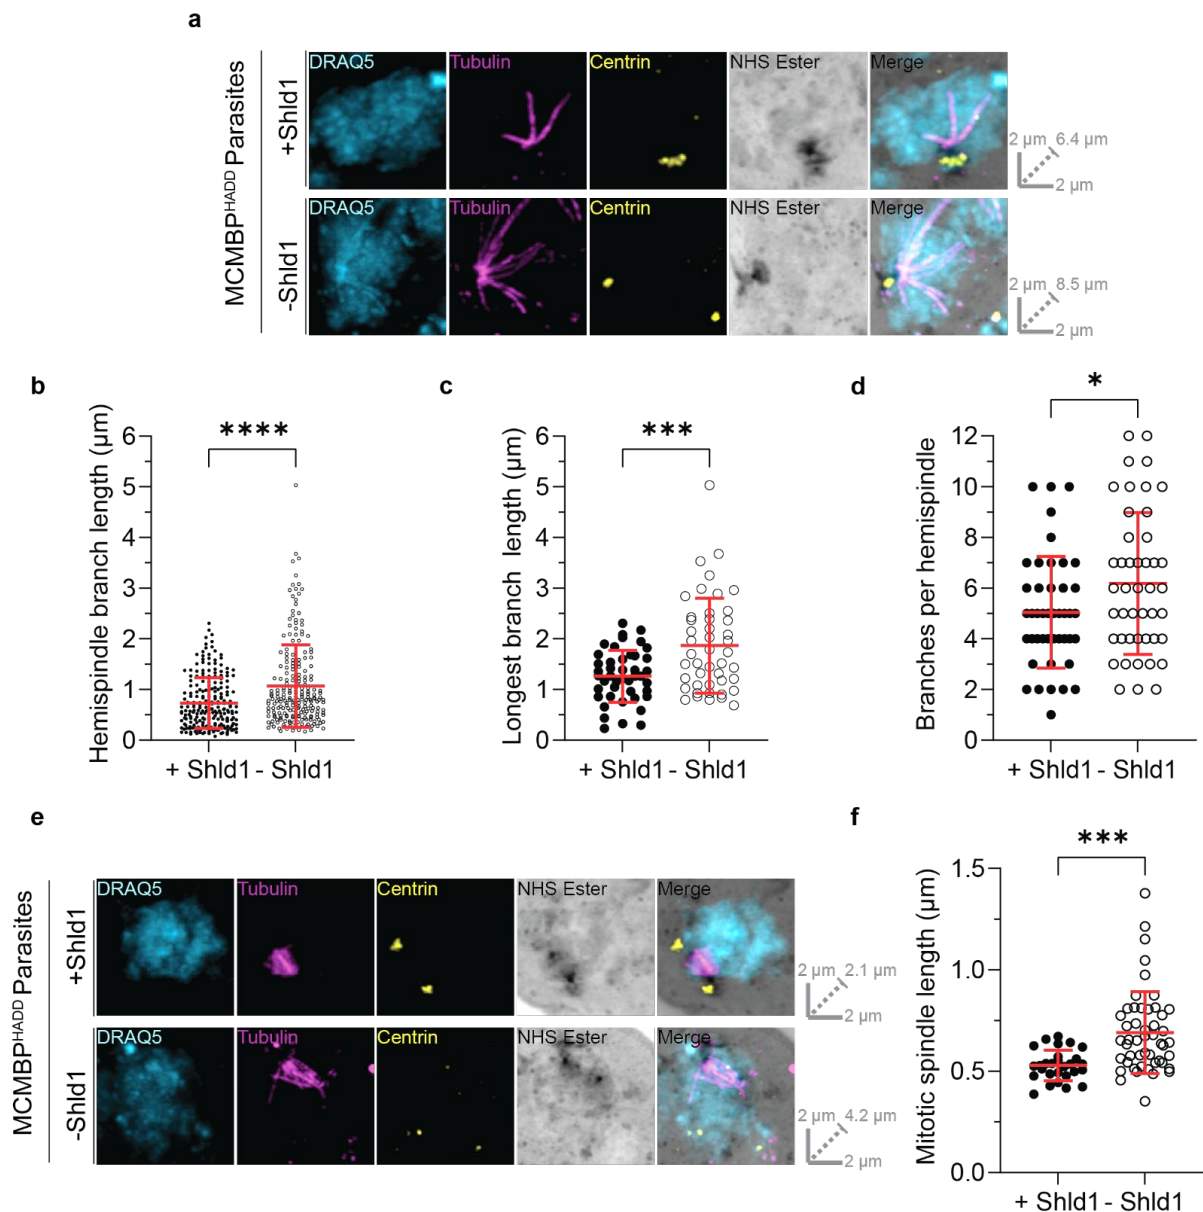

363 **Figure 2. MCMBP deficient parasites show defects in both mitotic spindle and hemispindle formation.**

364 *MCMBP<sup>HADD</sup>* parasites were cultured [+]/[-] *Shld1*. Parasites were then prepared for U-ExM, stained with a  
 365 nuclear stain (DRAQ5, in cyan), anti-tubulin (in magenta), anti-centrin (in yellow), and a protein stain (NHS  
 366 Ester, in grayscale), and visualized using Airyscan microscopy. **(a)** Hemispindles were imaged and the length of  
 367 all hemispindle branches **(b)**, of the longest branch in each individual hemispindle **(c)**, and the total number of  
 368 branches per hemispindle **(d)** were all measured.  $n = 221$  hemispindle branches and 45 hemispindles for +*Shld1*,  
 369 and 214 hemispindle branches and 45 hemispindles for -*Shld1* were measured across 3 biological replicates. **(e)**  
 370 Mitotic spindles were imaged and their length **(f)**, from one MTOC to another, was measured.  $n = 28$  for +*Shld1*  
 371 and 49 for -*Shld1*, across 3 biological replicates. All distance measurements presented here have been estimated  
 372 based on the average expansion factor of gels used in this study, raw values can be found in Supplementary Figure  
 373 2. (\* =  $p < 0.05$ , \*\*\* =  $p < 0.001$ , \*\*\*\* =  $p < 0.0001$  by unpaired two-tailed *t*-test, error bars = SD). All images  
 374 are maximum intensity projections. Slice-by-slice videos of images in found in Supplementary Videos 5-8. Scale  
 375 bars as labelled in each image, solid bars = XY scale, dashed bar = combined depth of slices used for Z-  
 376 projection.

377 **BODIPY TR ceramide stains the nuclear envelope of *P. falciparum* imaged by U-ExM.**

378 *Plasmodium* undergoes mitosis without breakdown of the nuclear envelope, and in  
379 doing so the nuclear envelope provides a critical barrier for the compartmentalization of the  
380 nucleus from the cytoplasm. Therefore, nuclear envelope integrity and remodeling are critical  
381 during *Plasmodium* mitosis. Despite the importance of nuclear envelope dynamics during  
382 schizogony, and *Plasmodium* mitosis, there is currently no reliable marker of the *P. falciparum*  
383 nuclear envelope for microscopic visualization. Previous studies have localized a few  
384 nucleoporins (nups) to the nuclear envelope of either *P. falciparum* [16,39] or *P. berghei* [40],  
385 but their distribution and number is dynamic across the lifecycle, limiting the robustness of  
386 nups as nuclear envelope markers. Therefore, we wanted to identify a uniform, U-ExM  
387 compatible stain for the *P. falciparum* nuclear envelope to allow us to study nuclear envelope  
388 changes in the context of MCMBP deficient parasites.

389 BODIPY TR ceramide (BODIPY TRc) is a commonly used fluorescent lipid stain,  
390 which has previously been used to stain live parasites from multiple different parasite lifecycle  
391 stages, across *P. falciparum* and *P. berghei*, and imaged in both fixed and live-cell microscopy  
392 [40-44]. Despite its extensive use, BODIPY TRc has not previously been reported to stain the  
393 nuclear envelope of *P. falciparum*. We coupled BODIPY TRc with U-ExM, with BODIPY  
394 TRc staining occurring post-expansion. Remarkably, we found that the *P. falciparum* nuclear  
395 envelope is consistently and reliably labelled by BODIPY TRc (Figure 3a). In addition to  
396 staining the nuclear envelope, BODIPY TRc enabled observation of the RBC membrane,  
397 PVM, PPM, and endoplasmic reticulum as previously demonstrated when staining live  
398 parasites [43-47] (Supplementary Figure 5). Together, we demonstrate that BODIPY TRc is the  
399 first *Plasmodium* nuclear envelope stain enabled by U-ExM.

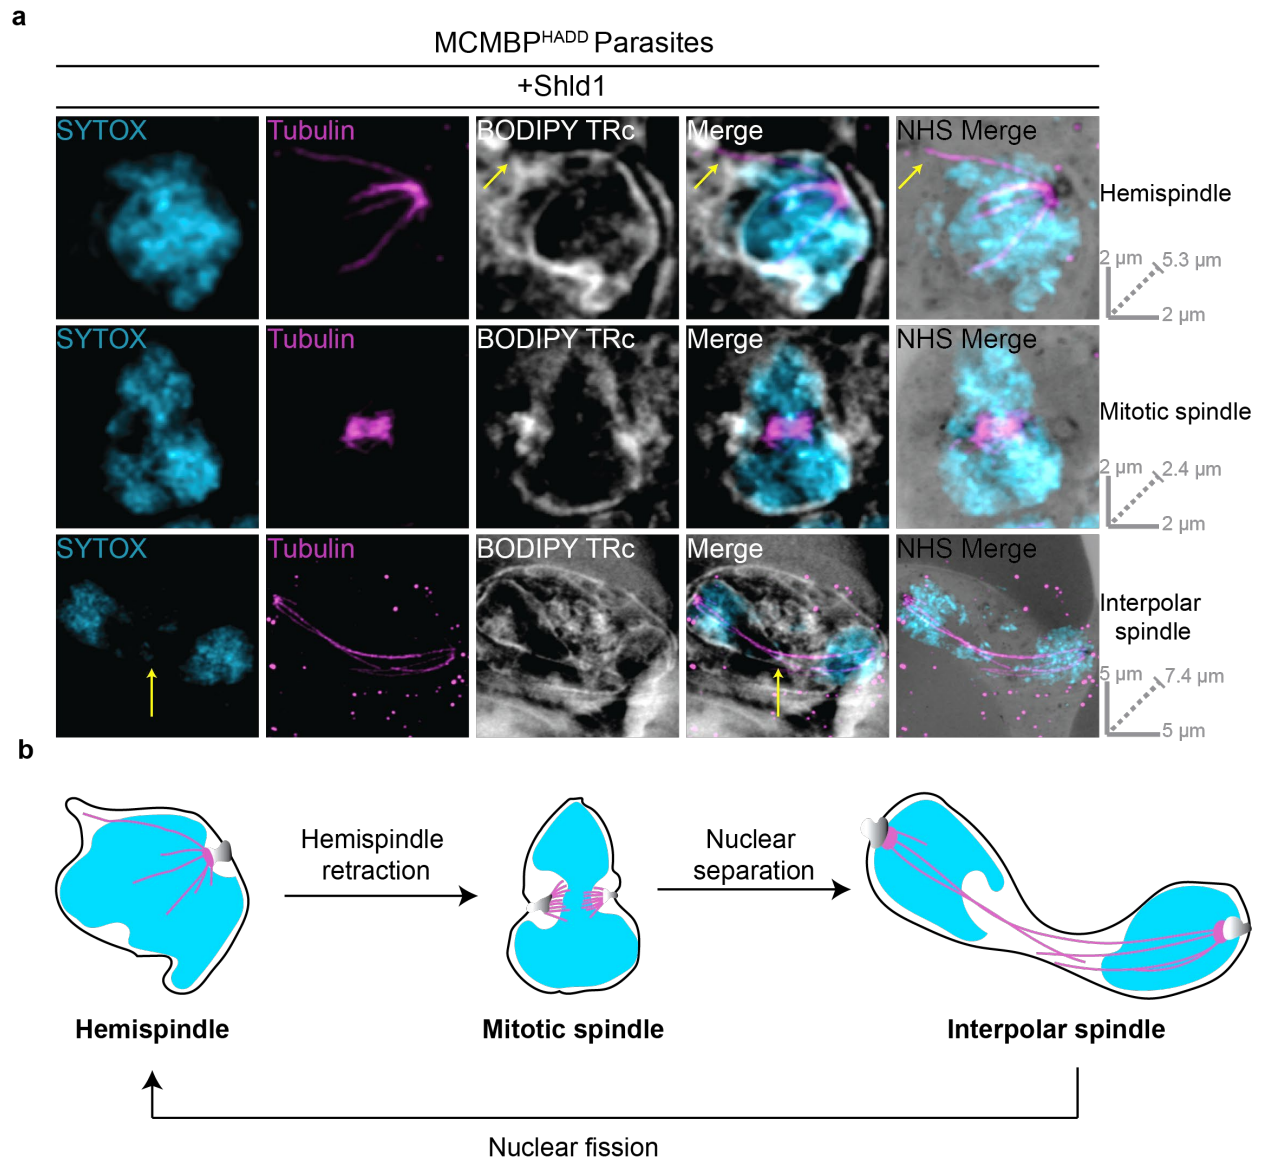

400  
401  
402  
403

**Figure 3. Nuclear envelope visualized using BODIPY TRc and U-ExM during mitosis of *P. falciparum* blood-stage.**

404 (a) MCMBP<sup>HADD</sup> parasites were cultured in the presence of Shld1. Parasites were then prepared for U-ExM,  
405 stained with a nuclear stain (SYTOX, in cyan), anti-tubulin (in magenta), a membrane stain (BODIPY Texas Red  
406 ceramide (TRc), in white), and a protein stain (NHS Ester, in grayscale), and visualized using Airyscan  
407 microscopy. Hemispindle arrow indicates microtubule not associated with chromatin. Interpolar spindle arrow  
408 indicates chromatin-free bridge region. Images containing BODIPY TRc are average intensity projections, while  
409 those with NHS ester are maximum intensity projections. Slice-by-slice videos of images in 3a found in  
410 Supplementary Videos 9-11. Scale bars as labelled in each image, solid bars = XY scale, dashed bar = combined  
411 depth of slices used for Z-projection. (b) Model for the progression between observed microtubule structures as  
412 inferred from [16]. Hemispindles are first observed but retract before formation of the mitotic spindle once DNA  
413 replication has occurred. After the formation of the mitotic spindle, two masses of DNA separate from each other  
414 but remain in a shared nuclear envelope with their MTOCs connected by the interpolar spindle. The nucleus then  
415 undergoes nuclear fission, separating the two separated DNA masses into daughter nuclei. Following nuclear  
416 fission, the hemispindle reforms and further rounds of mitosis occur.

417 To assess the relationship between intranuclear microtubule structures and the nuclear  
418 envelop, BODIPY TRc was coupled with U-ExM and tubulin staining (Figure 3a). Nuclei  
419 possessing each of the three microtubule structures display differently shaped nuclear  
420 envelopes. Nuclei with hemispindles show largely spherical nuclear envelopes, with some  
421 notable protrusions of the nuclear envelope to accommodate a hemispindle branch (Figure 3a).  
422 Nuclei with mitotic spindles display a marked pinching of the nuclear envelope around the site  
423 of the two MTOCs (Figure 3a). Nuclei with interpolar spindles show nuclear envelopes that  
424 look characteristically similar to the ‘dumbbell-shape’ of segregating nuclei in fission yeast  
425 (Figure 3a) [24]. Notably, the long and thin bridge region lacks DNA staining and the interpolar  
426 spindles themselves are often present extremely close to the nuclear envelope.

427 **MCMBP deficient parasites form anaphase chromatin bridges, leading to uneven DNA**  
428 **segregation and aneuploidy but still form subpellicular microtubules.**

429 It had previously been observed that MCMBP deficient parasites form complex  
430 aberrant spindles and hypothesized that chromatin connected multiple nuclei [25]. In the  
431 absence of a nuclear envelope marker, and at the resolution of conventional light microscopy,  
432 it could not be determined if these shared a single intact nuclear envelope. By visualizing  
433 interpolar spindles of MCMBP-deficient parasites at higher resolution, we were able to update  
434 this model. Most prominently, in all interpolar spindles imaged after expansion, there was  
435 significant DNA staining inside the bridge region of nuclei connected by interpolar spindles  
436 (Figure 4) (Supplementary Figure 6); reminiscent of chromatin bridges that occur during a  
437 defective anaphase of other organisms [48,49]. This contrasts with MCMBP<sup>HADD</sup> parasites  
438 grown in the presence of Shld1, where DNA staining was not observed inside this bridge region  
439 (Figure 1b,3a). We sometimes observed dividing nuclei with interpolar spindles where each  
440 nucleus was of vastly different size, potentially indicating uneven DNA segregation in some



441 nuclei following MCMBP knockdown (Supplementary Figure 6). Moreover, we also observed  
 442 interpolar spindles connecting MTOCs in nuclei that did not appear to be separating from each  
 443 other at all (Supplementary Figure 6). Collectively, this suggests that MCMBP deficient  
 444 parasites can form interpolar spindles but are unable to evenly segregate DNA into daughter  
 445 nuclei.

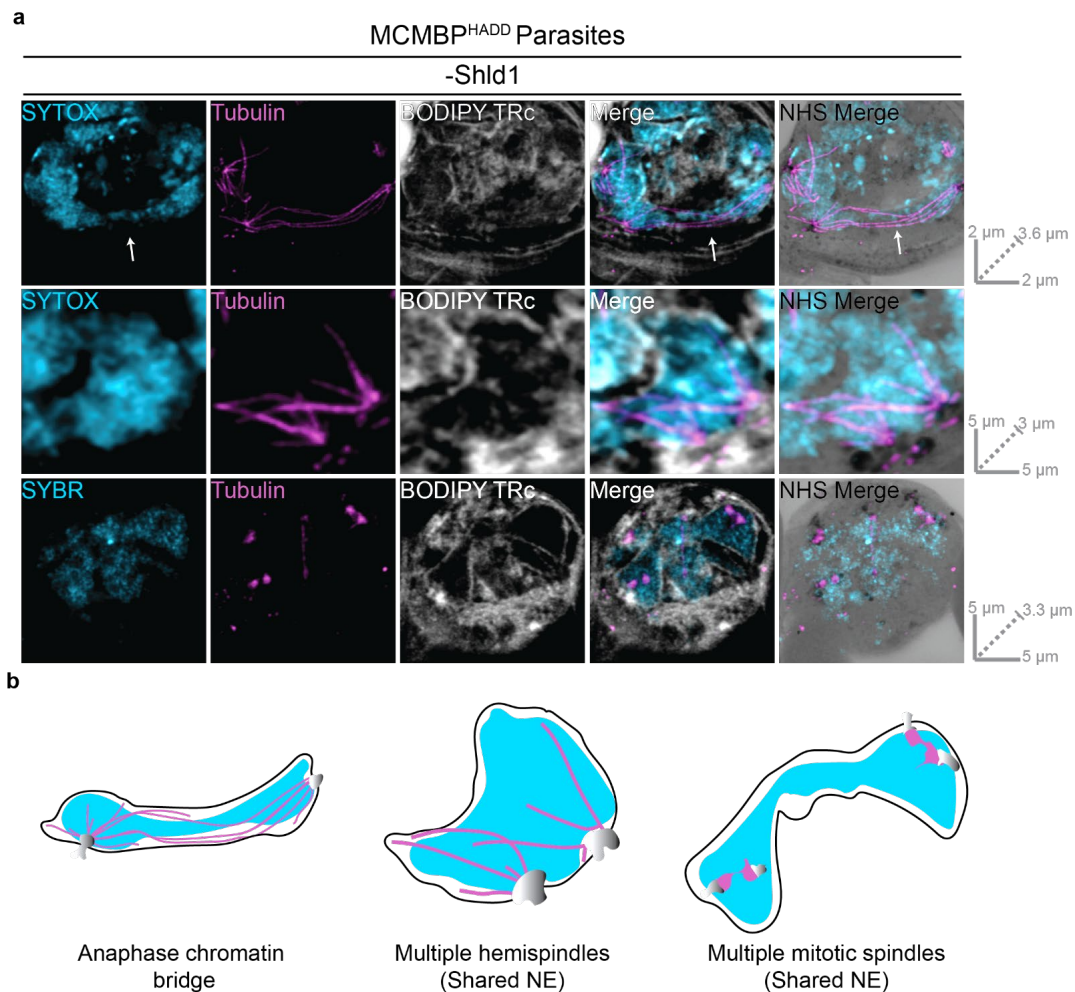

446  
 447 **Figure 4. MCMBP deficient parasites show defective interpolar spindles, uneven DNA segregation**  
 448 **and aneuploidy without cell cycle arrest.**

449 *(a)* MCMBP<sup>HADD</sup> parasites were cultured in the absence of Shld1. Parasites were then prepared for U-ExM,  
 450 stained with a nuclear stain (SYTOX or SYBR, in cyan), anti-tubulin (in magenta), a membrane stain (BODIPY  
 451 TRc, in white), and a protein stain (NHS Ester, in grayscale), and visualized using Airyscan microscopy. Arrow  
 452 indicates DNA staining in bridge-region. Images containing BODIPY TRc are average intensity projections, while  
 453 those with NHS ester are maximum intensity projections. Slice-by-slice videos of images in 4a found in  
 454 Supplementary Videos 12-14. Scale bars as labelled in each image, solid bars = XY scale, dashed bar = combined  
 455 depth of slices used for Z-projection. *(b)* Schematic representation of phenotypes overserved in Figure 4a.

456 In MCMBP<sup>HADD</sup> parasites grown in the absence of Shld1, we also frequently observed  
457 a single nuclear envelope that contained multiple microtubule structures and multiple MTOCs  
458 not connected by an interpolar spindle (Supplementary Figure 6). Nuclei were observed that  
459 contained two hemispindles and two MTOCs, which likely represent nuclei where nuclear  
460 fission either did not occur or had occurred aberrantly (Figure 4) (Supplementary Figure 6).  
461 Additionally, nuclei that contained two mitotic spindles and four MTOCs were also observed  
462 (Figure 4). This suggests that in the aberrant nuclei that contain two MTOCs after mitosis, both  
463 MTOCs can duplicate and form mitotic spindles in the same nucleus. Collectively, these  
464 observations suggest that MCMBP deficient parasites undergo uneven DNA segregation,  
465 leading to aneuploidy and nuclear fission defects, but that these defects don't inhibit further  
466 rounds of mitosis as shown previously [25].

467 Following multiple rounds of mitosis, *P. falciparum* commits to segmentation whereby  
468 nuclei and other organelles are enclosed into an individual PPM to form merozoites. In  
469 merozoites from segmented schizonts, the MTOC is no longer visible by NHS ester staining  
470 and there are no visible intranuclear microtubule structures (Figure 1b). During segmentation,  
471 the only visible microtubules are the subpellicular microtubules, which extend from apical  
472 polar ring 2 at the apical end of the merozoite to the basal complex as segmentation progresses  
473 (Figure 1b) [12,37,38,50]. MCMBP is not expressed while parasites are undergoing segmentation  
474 [25], but considering that MCMBP deficient parasites show intranuclear microtubule defects  
475 (Figure 2) (Figure 4) (Supplementary Figure 6), it could be hypothesized that MCMBP  
476 knockdown causes downstream subpellicular microtubule defects. To determine whether  
477 MCMBP knockdown caused global microtubule defects, or only of the intranuclear  
478 microtubules, we analyzed MCMBP<sup>HADD</sup> parasites grown in the presence of absence of Shld1  
479 that had been arrested post-segmentation with the schizont egress inhibitor E64 [35] by U-ExM.

480           In merozoites from MCMBP<sup>HADD</sup> schizonts grown in the absence of Shld1 subpellicular  
481 microtubules were observed (Supplementary Figure 7), suggesting that MCMBP deficient  
482 parasites do not display a global microtubule polymerization defect. However, through NHS  
483 ester and BODIPY TRc staining, it was observed that some merozoites contained multiple sets  
484 of subpellicular microtubules (Supplementary Figure 7). Additionally, merozoites had vastly  
485 differently sized nuclei and contained different varying numbers of rhoptries (Supplementary  
486 Figure 7). This confirmed previous observations that merozoites from segmented MCMBP  
487 deficient schizonts displayed aneuploidy [25]. Additionally, zoid merozoites, which lack DNA,  
488 were observed and they too contained subpellicular microtubules (Supplementary Figure 7).

489           Collectively, these results show that MCMBP deficient parasites form anaphase  
490 chromatin bridges and fail to undergo correct nuclear fission, resulting in aneuploidy and the  
491 presence of multiple microtubule structures inside the same nucleus (Figure 5). Despite these  
492 severe nuclear defects, these parasites undergo further rounds of mitosis and still undergo  
493 segmentation and form subpellicular microtubules; suggesting that MCMBP knockdown  
494 doesn't cause global microtubule polymerization defects (Figure 5).

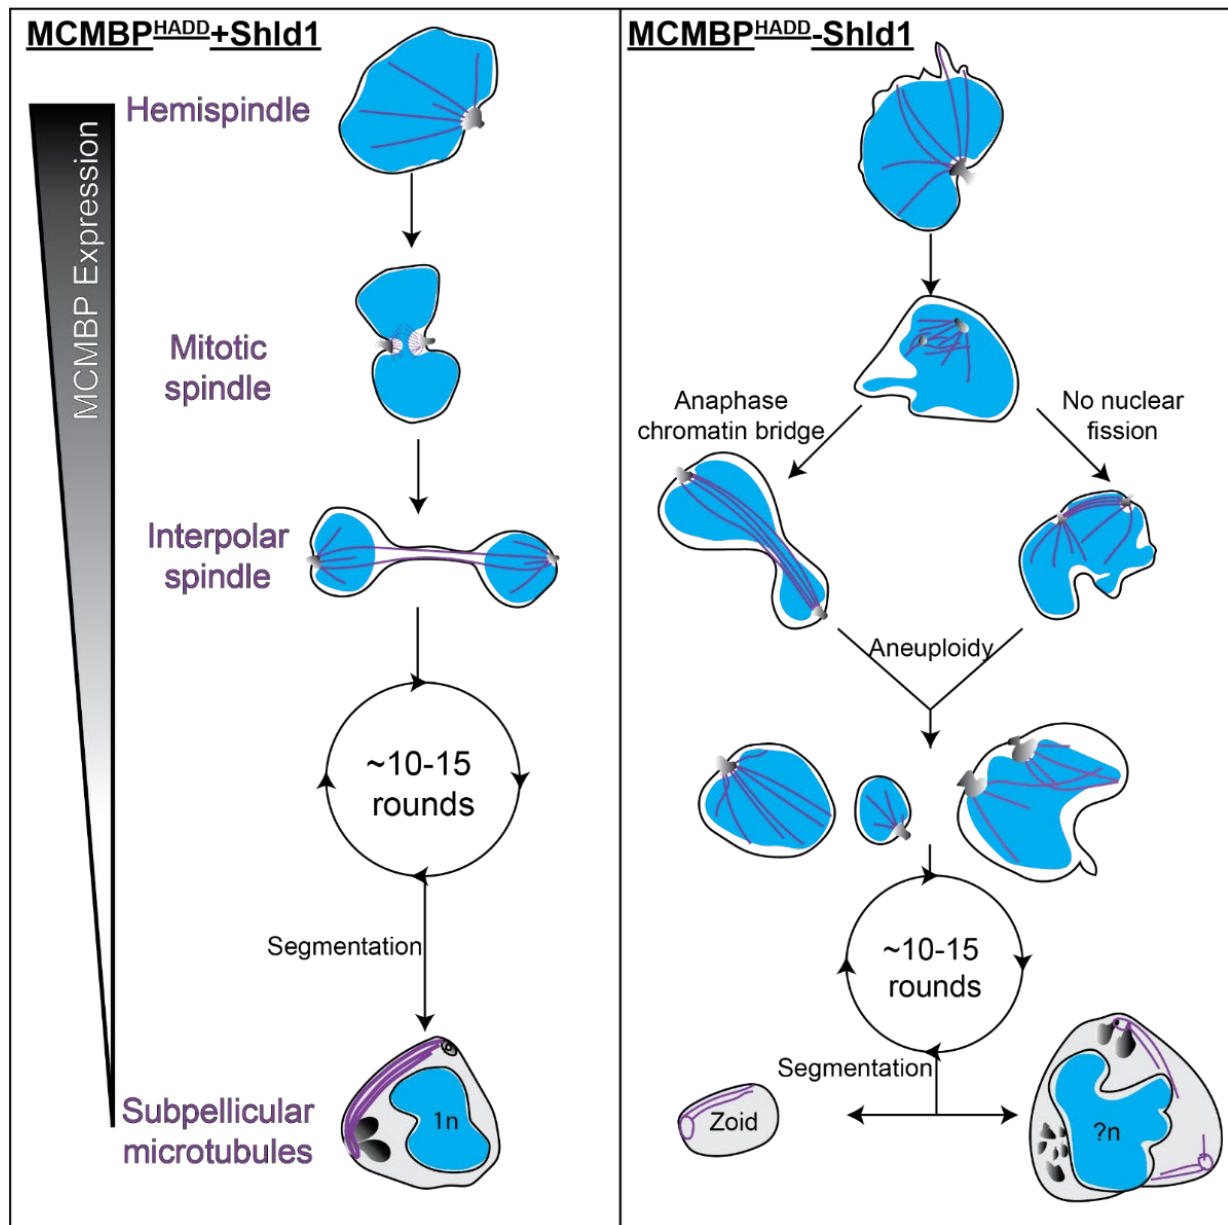

495

496 **Figure 5. Aneuploidy in MCMBP-deficient parasites is likely caused by the formation of anaphase**  
 497 **chromatin bridges and aberrant nuclear fission.**

498 *Hypothetical model for the progression of mitosis and segmentation in MCMBP<sup>HADD</sup> parasites either in the*  
 499 *presence (left) or absence (right) of Shld1. In the presence of Shld1, nuclei with a single MTOC form a*  
 500 *hemispindle. This hemispindle retracts and the MTOC duplicates and migrates to the opposing side of the nucleus*  
 501 *to form the mitotic spindle. The two MTOCs then move away from each other but remain connected by the*  
 502 *interpolar spindle. The nucleus then undergoes nuclear fission in the DNA-free bridge region to form two*  
 503 *daughter nuclei that each reform a hemispindle. The parasite undergoes multiple rounds of mitosis in this manner.*  
 504 *MCMBP is no longer expressed when the parasite commits to segmentation and the formation of merozoites,*  
 505 *where we observe subpellicular microtubules connecting the apical polar ring and basal complex. In the absence*  
 506 *of Shld1 we observe aberrant hemispindles and mitotic spindles. After forming the mitotic spindle, these nuclei*  
 507 *form interpolar spindles, but either form anaphase chromatin bridges and/or fail to undergo nuclear fission,*  
 508 *which both lead to aneuploidy. Aneuploid nuclei continue to undergo further rounds of mitosis and do undergo*  
 509 *segmentation. Segmentation, however, leads to the formation of cells of various size, including zoid parasites,*  
 510 *which lack nuclei, and large merozoites that contain multiple sets of organelles and more than 1n DNA content.*  
 511 *Blue = nuclei, purple = microtubules, greyscale = MTOC or rhoptries (in merozoites). n = number of genome*  
 512 *copies, ?n = unknown/uneven genome content.*



513

## DISCUSSION

514           The development of U-ExM and application to *P. falciparum* parasites, have allowed  
515 us to understand the functions of proteins and processes of *P. falciparum* to a level of detail  
516 not previously possible. We applied U-ExM in the context of MCMBP deficient parasites to  
517 significantly refine our understanding of the function of this protein during blood-stage  
518 replication of *P. falciparum*.

519           The U-ExM protocol used in this study is largely similar previously published protocols  
520 [16,22,36], with the notable modification of changing the protein crosslinking (FA/AA)  
521 incubation step from 5 hours to overnight, which significantly shortened day 1 of the U-ExM  
522 protocol. In this study, we harvested parasites at multiple timepoints throughout the lifecycle,  
523 and all -Shld1 cultures were harvested 3 hours after their +Shld1 counterparts due to the  
524 documented growth delay [25]. This shortening of day 1 of the U-ExM protocol made the  
525 protocol far more practical, enabling the progressive study of different lifecycle stages in the  
526 same U-ExM experiment, rather than having to harvest different lifecycle stages as  
527 independent experiments.

528           In addition to highlighting new biology, our application of U-ExM allowed us to  
529 identify some potential drawbacks of this technique. Notably absent in all images of U-ExM  
530 parasites were the food vacuole and hemozoin crystal. Through NHS ester staining of  
531 unexpanded parasites (Figure 1a), the likely location of the hemozoin crystal and food vacuole  
532 could be inferred due to a distinct lack of staining. By contrast, there was no indication on U-  
533 ExM parasites of where the hemozoin crystal or food vacuole membrane would be located  
534 based on NHS ester or BODIPY TRc staining. We hypothesize that the hemozoin crystal either  
535 does not get anchored, or does not expand with the gel, potentially limiting the utility of U-  
536 ExM for studies of hemoglobin catabolism and hemozoin biomineralization.

537           In this study a wide range of nucleic acid stains were used on U-ExM parasites: DAPI,  
538 DRAQ5, SYBR Green and SYTOX red. Notably, all these stains showed considerably more  
539 photobleaching than we would observe in unexpanded parasites; particularly SYBR Green,  
540 which began visibly photobleaching almost immediately. The reason for this is not clear, but  
541 it should be noted that while in unexpanded MCMBP deficient parasites a clear nuclear staining  
542 defect was observed [25], the same could not be readily observed in U-ExM parasites. At the  
543 concentrations used in this study, we found SYTOX red to be the brightest and most  
544 photostable of the nucleic acid stains used. Potentially related to the changes in chromatin was  
545 our inability to localize MCMBP by U-ExM. MCMBP has previously been localized in  
546 unexpanded parasites, showing nuclear and cytoplasmic foci [25]. Despite this, our attempts to  
547 localize MCMBP by U-ExM showed no significant signal. It has been noted previously that  
548 some antibodies appear to be incompatible with U-ExM [36], although the reasons for this are  
549 unclear, but this does not appear to be the case as the anti-HA antibody we used to detect  
550 MCMBP has previously been used successfully on U-ExM samples [16]. Given that the  
551 canonical role of MCMBP is to bind DNA, and we observe significant differences in the  
552 appearance of DNA in U-ExM parasites, it is possible that some DNA-binding proteins are not  
553 retained after U-ExM.

554           BODIPY TRc stained parasites presented in this study were stained post-expansion.  
555 We attempted to stain live cells with BODIPY TRc or include BODIPY TRc with the primary  
556 or secondary antibody incubations but this uniformly resulted in extremely faint staining (data  
557 not shown). Additionally, we tried to stain parasites with Nile red, which has previously been  
558 shown to stain some organelles in unexpanded *P. falciparum* blood-stage parasites [45]; but this  
559 was also unsuccessful (data now shown). Overall, this suggests that potentially large  
560 differences exist in the fluorescent stains that are compatible with unexpanded *P. falciparum*  
561 compared to with U-ExM.

562 BODIPY TRc staining of schizonts allowed visualization of the PPM of each  
563 merozoite, the PVM, RBC membrane and nuclear envelope, but did not reveal any structures  
564 that could be characteristically identified as the apicoplast or mitochondrion as have been  
565 identified by EM studies [12]. Additionally, both the surface and lumen the rhoptries of  
566 merozoites stained very strongly with BODIPY TRc, which would support previous  
567 observations that the rhoptries contain membranous whorls [37,51]. To date, these membranous  
568 whorls have not been observed by light microscopy [52], highlighting the use of U-ExM  
569 coupled with BODIPY TRc for studying merozoite physiology.

570 We show that MCMBP knockdown results in the aberrant formation of all intranuclear  
571 microtubule structures but not of subpellicular microtubules, which are formed when MCMBP  
572 is no longer expressed [25]. Moreover, the combination of NHS ester and BODIPY TRc with  
573 U-ExM allowed us to assess the MTOC and nuclear envelope at a level of detail reminiscent  
574 of electron microscopy. This also confirmed that the in the blood-stage of *P. falciparum* the  
575 MTOC spans the nuclear envelope, as previously reported [16]. The combination of BODIPY  
576 TRc and NHS ester staining allowed us to show that aneuploidy in MCMBP deficient parasites  
577 is due formation of anaphase chromatin bridges and/or a lack of nuclear fission (Figure 5). We  
578 hypothesize that these lead to the downstream phenotypes we see of wildly varied nuclear size  
579 and zoid merozoites following cytokinesis.

580 The observation of anaphase chromatin bridges in MCMBP-deficient parasites is  
581 supported by the canonical function in the MCM complex [26]. In other organisms, the presence  
582 of MCMBP has been shown to promote dissociation between the MCM complex and  
583 chromatin, allowing separation of sister chromatids [53-55]. Moreover, MCMBP of *P.*  
584 *falciparum* has been shown to interact with the members of the condensin complex structural  
585 maintenance of chromosomes (SMC) 2 and 4 [25]. SMC2 and SMC4 have canonical roles in  
586 chromosome condensation [56,57], and have recently been shown to be involved in *Plasmodium*

587 chromosome separation [58]. Inhibition of SMC2 [59], SMC4 [60] and MCM complex member  
588 MCM7 [61] have all been shown to lead to the formation of anaphase chromatin bridges in  
589 other organisms. Therefore, we suggest that the observation of anaphase chromatin bridges in  
590 MCMBP-deficient *P. falciparum* may be caused by either an ability to properly separate sister  
591 chromatids, or a defect in the detachment of microtubules from chromosomes. Currently, the  
592 relationship between the formation of anaphase chromatin bridges and nuclear fission is  
593 unclear. But given that inhibition of SMC2, SMC4, and MCM7 causes anaphase chromatin  
594 bridges in organisms that undergo open mitosis, and therefore do not undergo nuclear fission,  
595 defective nuclear fission is not a pre-requisite for the formation of anaphase chromatin bridges.

596         While we observe anaphase chromatin bridges and multiple microtubule structures in  
597 a single nucleus following depletion of MCMBP, using MCMBP<sup>HADD</sup> parasites these events  
598 do not occur in every round of mitosis. If this were the case, we would expect to see all DNA  
599 staining contained within a single, giant, nuclear envelope, but we do not. Given that the  
600 knockdown system used leads to imperfect and uneven depletion of MCMBP, it is possible  
601 that the phenotypic heterogeneity we observe is a product of differing levels of MCMBP.  
602 MCMBP is likely essential for growth in the blood-stage of *Plasmodium* [62,63], and we  
603 hypothesize that the complete removal of MCMBP would lead to the formation of anaphase  
604 chromatin bridges and inhibited nuclear fission in every round of mitosis.

605         Our observations of microtubules, following U-ExM, were largely concordant with  
606 recent studies that also made measurements of branch and spindle lengths [16,22].  
607 Measurements for mitotic spindle length, hemispindle branch length and hemispindle branch  
608 number all reported similar results [16,22]. Neither data set, however, controlled for the number  
609 of nuclei per cell and so it is currently unclear whether any of these measurements change later  
610 in the parasite lifecycle. One difference observed in our study however, was the presence of  
611 hemispindle-like branches in nuclei connected by interpolar spindles (referred to as anaphase

612 spindles in that study) [16]. Previous images have only observed the long interpolar branches  
613 connecting the MTOCs, without smaller branches in each nucleus [16]. Critically, a previous  
614 hypothesis suggested that the hemispindle formed as a remnant of the retraction of the  
615 interpolar spindle [64]. Our observation that the two seem to co-exist would suggest that this is  
616 not the case. Moreover, this suggests that whatever the function(s) of hemispindles are, likely  
617 begin immediately following nuclear segregation and before nuclear fission.

618 Overall, this study provides insight into the poorly understood, yet therapeutically  
619 attractive and biologically fascinating, process of mitosis in *P. falciparum*. Our findings  
620 significantly further our understanding of the phenotype of parasites following knockdown of  
621 MCMBP. Importantly, these insights were only possible because of the application of U-ExM  
622 to *P. falciparum*. Moreover, we developed BODIPY TRc as the first U-ExM-compatible stain  
623 to visualize the nuclear envelope and used this to develop our understanding of both MCMBP  
624 deficient parasites, and parasite physiology more broadly.

625

626

#### ACKNOWLEDGEMENTS

627 We thank Jeff Dvorin for provision of anti-BIP antibodies. We thank Julien Guizetti,  
628 Eloïse Bertiaux, Vincent Louvel, Caroline Simon, and Johanna Bauer for their help with U-  
629 ExM setup. We also thank Julien Guizetti for help with sample preparation when imaging  
630 microtubules. We thank Rachel Rudlaff and James Blauwkamp for critical reading of the  
631 manuscript.

632

633

634

635

## AUTHOR CONTRIBUTIONS

636           Conceptualization, B.L. and S.A.; methodology, B.L.; formal analysis, B.L.; writing—  
637 original draft preparation, B.L.; writing—review and editing, B.L. and S.A.; supervision, S.A.;  
638 project administration, S.A.; funding acquisition, S.A. All authors have read and agreed to the  
639 published version of the manuscript.

640

## FUNDING

641           This project was supported by an award from the Ralph W. and Grace M. Showalter  
642 Research Trust and the Indiana University School of Medicine. The content is solely the  
643 responsibility of the authors and does not necessarily represent the official views of the  
644 Showalter Research Trust or the Indiana University School of Medicine.

645

## COMPETING INTERESTS

646           The authors declare no conflict of interest. The funders had no role in the design of the  
647 study; in the collection, analyses, or interpretation of data; in the writing of the manuscript, or  
648 in the decision to publish the results.

649

650

651

652

653

- 655 1. World Health Organization. *World Malaria Report 2020*; 2020.
- 656 2. Imwong, M.; Dhorda, M.; Myo Tun, K.; Thu, A.M.; Phyo, A.P.; Proux, S.;  
657 Suwannasin, K.; Kunasol, C.; Srisutham, S.; Duanguppama, J.; et al. Molecular  
658 epidemiology of resistance to antimalarial drugs in the Greater Mekong subregion: an  
659 observational study. *The Lancet Infectious Diseases* **2020**, *20*, 1470-1480,  
660 doi:[https://doi.org/10.1016/S1473-3099\(20\)30228-0](https://doi.org/10.1016/S1473-3099(20)30228-0).
- 661 3. Menard, D.; Dondorp, A. Antimalarial Drug Resistance: A Threat to Malaria  
662 Elimination. *Cold Spring Harbor Perspectives in Medicine* **2017**, *7*,  
663 doi:10.1101/cshperspect.a025619.
- 664 4. Ashley, E.A.; Dhorda, M.; Fairhurst, R.M.; Amaratunga, C.; Lim, P.; Suon, S.; Sreng,  
665 S.; Anderson, J.M.; Mao, S.; Sam, B.; et al. Spread of artemisinin resistance in  
666 *Plasmodium falciparum* malaria. *N Engl J Med* **2014**, *371*, 411-423,  
667 doi:10.1056/NEJMoa1314981.
- 668 5. Uwimana, A.; Legrand, E.; Stokes, B.H.; Ndikumana, J.M.; Warsame, M.; Umulisa,  
669 N.; Ngamije, D.; Munyaneza, T.; Mazarati, J.B.; Munguti, K.; et al. Emergence and  
670 clonal expansion of *in vitro* artemisinin-resistant *Plasmodium falciparum* kelch13  
671 R561H mutant parasites in Rwanda. *Nat Med* **2020**, *26*, 1602-1608,  
672 doi:10.1038/s41591-020-1005-2.
- 673 6. Balikagala, B.; Fukuda, N.; Ikeda, M.; Katuro, O.T.; Tachibana, S.-I.; Yamauchi, M.;  
674 Opio, W.; Emoto, S.; Anywar, D.A.; Kimura, E.; et al. Evidence of Artemisinin-  
675 Resistant Malaria in Africa. *New England Journal of Medicine* **2021**, *385*, 1163-1171,  
676 doi:10.1056/NEJMoa2101746.
- 677 7. Pham, T.D.M.; Ziora, Z.M.; Blaskovich, M.A.T. Quinolone antibiotics.  
678 *Medchemcomm* **2019**, *10*, 1719-1739, doi:10.1039/c9md00120d.
- 679 8. Magden, J.; Kääriäinen, L.; Ahola, T. Inhibitors of virus replication: recent  
680 developments and prospects. *Appl Microbiol Biotechnol* **2005**, *66*, 612-621,  
681 doi:10.1007/s00253-004-1783-3.
- 682 9. Berdis, A.J. Inhibiting DNA Polymerases as a Therapeutic Intervention against  
683 Cancer. *Frontiers in Molecular Biosciences* **2017**, *4*, doi:10.3389/fmolb.2017.00078.
- 684 10. Belete, T.M. Recent Progress in the Development of New Antimalarial Drugs with  
685 Novel Targets. *Drug Des Devel Ther* **2020**, *14*, 3875-3889,  
686 doi:10.2147/DDDT.S265602.
- 687 11. Francia, M.E.; Striepen, B. Cell division in apicomplexan parasites. *Nature Reviews*  
688 *Microbiology* **2014**, *12*, 125-136, doi:10.1038/nrmicro3184.
- 689 12. Rudlaff, R.M.; Kraemer, S.; Marshman, J.; Dvorin, J.D. Three-dimensional  
690 ultrastructure of *Plasmodium falciparum* throughout cytokinesis. *PLOS Pathogens*  
691 **2020**, *16*, e1008587, doi:10.1371/journal.ppat.1008587.



- 692 13. Rudlaff, R.M.; Kraemer, S.; Streva, V.A.; Dvorin, J.D. An essential contractile ring  
693 protein controls cell division in *Plasmodium falciparum*. *Nature Communications*  
694 **2019**, *10*, 2181, doi:10.1038/s41467-019-10214-z.
- 695 14. Gerald, N.; Mahajan, B.; Kumar, S. Mitosis in the Human Malaria Parasite  
696 *Plasmodium falciparum*. *Eukaryotic Cell* **2011**, *10*, 474-482,  
697 doi:doi:10.1128/EC.00314-10.
- 698 15. Read, M.; Sherwin, T.; Holloway, S.P.; Gull, K.; Hyde, J.E. Microtubular  
699 organization visualized by immunofluorescence microscopy during erythrocytic  
700 schizogony in *Plasmodium falciparum* and investigation of post-translational  
701 modifications of parasite tubulin. *Parasitology* **1993**, *106* ( Pt 3), 223-232,  
702 doi:10.1017/s0031182000075041.
- 703 16. Simon, C.S.; Funaya, C.; Bauer, J.; Voß, Y.; Machado, M.; Penning, A.; Klaschka,  
704 D.; Cyrklaff, M.; Kim, J.; Ganter, M.; et al. An extended DNA-free intranuclear  
705 compartment organizes centrosomal microtubules in *Plasmodium falciparum*. *Life*  
706 *Science Alliance* **2021**, *4*, e202101199, doi:10.26508/lsa.202101199.
- 707 17. Mehnert, A.-K.; Simon, C.S.; Guizetti, J. Immunofluorescence staining protocol for  
708 STED nanoscopy of *Plasmodium*-infected red blood cells. *Molecular and*  
709 *Biochemical Parasitology* **2019**, *229*, 47-52,  
710 doi:<https://doi.org/10.1016/j.molbiopara.2019.02.007>.
- 711 18. Schrével, J.; Asfaux-Foucher, G.; Bafort, J.M. Ultrastructural study of multiple  
712 mitoses during sporogony of *Plasmodium b. berghei*. *J Ultrastruct Res* **1977**, *59*, 332-  
713 350, doi:10.1016/s0022-5320(77)90043-0.
- 714 19. Fennell, B.J.; Naughton, J.A.; Dempsey, E.; Bell, A. Cellular and molecular actions of  
715 dinitroaniline and phosphorothioamidate herbicides on *Plasmodium falciparum*:  
716 tubulin as a specific antimalarial target. *Mol Biochem Parasitol* **2006**, *145*, 226-238,  
717 doi:10.1016/j.molbiopara.2005.08.020.
- 718 20. Fennell, B.J.; Al-shatr, Z.A.; Bell, A. Isotype expression, post-translational  
719 modification and stage-dependent production of tubulins in erythrocytic *Plasmodium*  
720 *falciparum*. *Int J Parasitol* **2008**, *38*, 527-539, doi:10.1016/j.ijpara.2007.09.005.
- 721 21. Zeeshan, M.; Pandey, R.; Ferguson, D.J.P.; Tromer, E.C.; Markus, R.; Abel, S.;  
722 Brady, D.; Daniel, E.; Limenitakis, R.; Bottrill, A.R.; et al. Real-time dynamics of  
723 *Plasmodium* NDC80 reveals unusual modes of chromosome segregation during  
724 parasite proliferation. *Journal of Cell Science* **2020**, *134*, doi:10.1242/jcs.245753.
- 725 22. Bertiaux, E.; Balestra, A.C.; Bournonville, L.; Louvel, V.; Maco, B.; Soldati-Favre,  
726 D.; Brochet, M.; Guichard, P.; Hamel, V. Expansion microscopy provides new  
727 insights into the cytoskeleton of malaria parasites including the conservation of a  
728 conoid. *PLOS Biology* **2021**, *19*, e3001020, doi:10.1371/journal.pbio.3001020.
- 729 23. Rashpa, R.; Brochet, M. Ultrastructure expansion microscopy of *Plasmodium*  
730 gametocytes reveals the molecular architecture of a microtubule organisation centre  
731 coordinating mitosis with axoneme assembly. *bioRxiv* **2021**, 2021.2007.2021.453039,  
732 doi:10.1101/2021.07.21.453039.



- 733 24. Dey, G.; Culley, S.; Curran, S.; Schmidt, U.; Henriques, R.; Kukulski, W.; Baum, B.  
734 Closed mitosis requires local disassembly of the nuclear envelope. *Nature* **2020**, *585*,  
735 119-123, doi:10.1038/s41586-020-2648-3.
- 736 25. Absalon, S.; Dvorin, J.D. Depletion of the mini-chromosome maintenance complex  
737 binding protein allows the progression of cytokinesis despite abnormal karyokinesis  
738 during the asexual development of *Plasmodium falciparum*. *Cellular Microbiology*  
739 **2021**, *23*, e13284, doi:<https://doi.org/10.1111/cmi.13284>.
- 740 26. Quimbaya, M.; Raspé, E.; Denecker, G.; De Craene, B.; Roelandt, R.; Declercq, W.;  
741 Sagaert, X.; De Veylder, L.; Berx, G. Deregulation of the replisome factor MCMBP  
742 prompts oncogenesis in colorectal carcinomas through chromosomal instability.  
743 *Neoplasia* **2014**, *16*, 694-709, doi:10.1016/j.neo.2014.07.011.
- 744 27. Jagannathan, M.; Sakwe, A.M.; Nguyen, T.; Frappier, L. The MCM-associated  
745 protein MCM-BP is important for human nuclear morphology. *J Cell Sci* **2012**, *125*,  
746 133-143, doi:10.1242/jcs.089938.
- 747 28. Kim, H.S.; Park, S.H.; Günzl, A.; Cross, G.A. MCM-BP is required for repression of  
748 life-cycle specific genes transcribed by RNA polymerase I in the mammalian  
749 infectious form of *Trypanosoma brucei*. *PLoS One* **2013**, *8*, e57001,  
750 doi:10.1371/journal.pone.0057001.
- 751 29. Matthews, H.; Duffy, C.W.; Merrick, C.J. Checks and balances? DNA replication and  
752 the cell cycle in *Plasmodium*. *Parasites & Vectors* **2018**, *11*, 216,  
753 doi:10.1186/s13071-018-2800-1.
- 754 30. Trager, W.; Jensen, J.B. Human malaria parasites in continuous culture. *Science* **1976**,  
755 *193*, 673-675, doi:10.1126/science.781840.
- 756 31. Armstrong, C.M.; Goldberg, D.E. An FKBP destabilization domain modulates protein  
757 levels in *Plasmodium falciparum*. *Nature Methods* **2007**, *4*, 1007-1009,  
758 doi:10.1038/nmeth1132.
- 759 32. Trang, D.T.X.; Huy, N.T.; Kariu, T.; Tajima, K.; Kamei, K. One-step concentration of  
760 malarial parasite-infected red blood cells and removal of contaminating white blood  
761 cells. *Malar J* **2004**, *3*, 7-7, doi:10.1186/1475-2875-3-7.
- 762 33. Lambros, C.; Vanderberg, J.P. Synchronization of *Plasmodium falciparum*  
763 erythrocytic stages in culture. *J Parasitol* **1979**, *65*, 418-420.
- 764 34. Ribaut, C.; Berry, A.; Chevalley, S.; Reybier, K.; Morlais, I.; Parzy, D.; Nepveu, F.;  
765 Benoit-Vical, F.; Valentin, A. Concentration and purification by magnetic separation  
766 of the erythrocytic stages of all human *Plasmodium* species. *Malar J* **2008**, *7*, 45,  
767 doi:10.1186/1475-2875-7-45.
- 768 35. Salmon, B.L.; Oksman, A.; Goldberg, D.E. Malaria parasite exit from the host  
769 erythrocyte: A two-step process requiring extraerythrocytic proteolysis. *Proceedings*  
770 *of the National Academy of Sciences* **2001**, *98*, 271-276, doi:10.1073/pnas.98.1.271.
- 771 36. Gambarotto, D.; Hamel, V.; Guichard, P. Ultrastructure expansion microscopy (U-  
772 ExM). *Methods Cell Biol* **2021**, *161*, 57-81, doi:10.1016/bs.mcb.2020.05.006.

- 773 37. Hanssen, E.; Dekiwadia, C.; Riglar, D.T.; Rug, M.; Lemgruber, L.; Cowman, A.F.;  
774 Cyrklaff, M.; Kudryashev, M.; Frischknecht, F.; Baum, J.; et al. Electron tomography  
775 of *Plasmodium falciparum* merozoites reveals core cellular events that underpin  
776 erythrocyte invasion. *Cellular Microbiology* **2013**, *15*, 1457-1472,  
777 doi:<https://doi.org/10.1111/cmi.12132>.
- 778 38. Bannister, L.H.; Hopkins, J.M.; Dluzewski, A.R.; Margos, G.; Williams, I.T.;  
779 Blackman, M.J.; Kocken, C.H.; Thomas, A.W.; Mitchell, G.H. *Plasmodium*  
780 *falciparum* apical membrane antigen 1 (PfAMA-1) is translocated within micronemes  
781 along subpellicular microtubules during merozoite development. *Journal of Cell*  
782 *Science* **2003**, *116*, 3825-3834, doi:10.1242/jcs.00665.
- 783 39. Guizetti, J.; Martins, R.M.; Guadagnini, S.; Claes, A.; Scherf, A. Nuclear Pores and  
784 Perinuclear Expression Sites of *var* and Ribosomal DNA Genes Correspond to  
785 Physically Distinct Regions in *Plasmodium falciparum*. *Eukaryotic Cell* **2013**, *12*,  
786 697-702, doi:doi:10.1128/EC.00023-13.
- 787 40. Kehrer, J.; Kuss, C.; Andres-Pons, A.; Reustle, A.; Dahan, N.; Devos, D.;  
788 Kudryashev, M.; Beck, M.; Mair, G.R.; Frischknecht, F. Nuclear Pore Complex  
789 Components in the Malaria Parasite *Plasmodium berghei*. *Scientific Reports* **2018**, *8*,  
790 11249, doi:10.1038/s41598-018-29590-5.
- 791 41. Dearnley, M.K.; Yeoman, J.A.; Hanssen, E.; Kenny, S.; Turnbull, L.; Whitchurch,  
792 C.B.; Tilley, L.; Dixon, M.W.A. Origin, composition, organization and function of the  
793 inner membrane complex of *Plasmodium falciparum* gametocytes. *Journal of Cell*  
794 *Science* **2012**, *125*, 2053-2063, doi:10.1242/jcs.099002.
- 795 42. Grüring, C.; Heiber, A.; Kruse, F.; Ungefehr, J.; Gilberger, T.-W.; Spielmann, T.  
796 Development and host cell modifications of *Plasmodium falciparum* blood stages in  
797 four dimensions. *Nature Communications* **2011**, *2*, 165, doi:10.1038/ncomms1169.
- 798 43. Thakur, V.; Asad, M.; Jain, S.; Hossain, M.E.; Gupta, A.; Kaur, I.; Rathore, S.; Ali,  
799 S.; Khan, N.J.; Mohammed, A. Eps15 homology domain containing protein of  
800 *Plasmodium falciparum* (PfeHD) associates with endocytosis and vesicular  
801 trafficking towards neutral lipid storage site. *Biochimica et Biophysica Acta (BBA) -*  
802 *Molecular Cell Research* **2015**, *1853*, 2856-2869,  
803 doi:<https://doi.org/10.1016/j.bbamcr.2015.08.007>.
- 804 44. Tran, P.N.; Brown, S.H.J.; Mitchell, T.W.; Matuschewski, K.; McMillan, P.J.; Kirk,  
805 K.; Dixon, M.W.A.; Maier, A.G. A female gametocyte-specific ABC transporter  
806 plays a role in lipid metabolism in the malaria parasite. *Nature Communications* **2014**,  
807 *5*, 4773, doi:10.1038/ncomms5773.
- 808 45. Tran, P.N.; Brown, S.H.J.; Rug, M.; Ridgway, M.C.; Mitchell, T.W.; Maier, A.G.  
809 Changes in lipid composition during sexual development of the malaria parasite  
810 *Plasmodium falciparum*. *Malar J* **2016**, *15*, 73, doi:10.1186/s12936-016-1130-z.
- 811 46. Adisa, A.; Rug, M.; Klonis, N.; Foley, M.; Cowman, A.F.; Tilley, L. The Signal  
812 Sequence of Exported Protein-1 Directs the Green Fluorescent Protein to the  
813 Parasitophorous Vacuole of Transfected Malaria Parasites \*. *Journal of Biological*  
814 *Chemistry* **2003**, *278*, 6532-6542, doi:10.1074/jbc.M207039200.

- 815 47. Meibalan, E.; Comunale, M.A.; Lopez, A.M.; Bergman, L.W.; Mehta, A.; Vaidya,  
816 A.B.; Burns, J.M. Host Erythrocyte Environment Influences the Localization of  
817 Exported Protein 2, an Essential Component of the *Plasmodium* Translocon.  
818 *Eukaryotic Cell* **2015**, *14*, 371-384, doi:doi:10.1128/EC.00228-14.
- 819 48. Finardi, A.; Massari, L.F.; Visintin, R. Anaphase Bridges: Not All Natural Fibers Are  
820 Healthy. *Genes* **2020**, *11*, 902.
- 821 49. Zachos, G. Regulating Cytokinesis. In *Encyclopedia of Cell Biology*, Bradshaw, R.A.,  
822 Stahl, P.D., Eds.; Academic Press: Waltham, 2016; pp. 494-503.
- 823 50. Koreny, L.; Zeeshan, M.; Barylyuk, K.; Tromer, E.C.; van Hooff, J.J.E.; Brady, D.;  
824 Ke, H.; Chelaghma, S.; Ferguson, D.J.P.; Eme, L.; et al. Molecular characterization of  
825 the conoid complex in *Toxoplasma* reveals its conservation in all apicomplexans,  
826 including *Plasmodium* species. *PLoS Biology* **2021**, *19*, e3001081,  
827 doi:10.1371/journal.pbio.3001081.
- 828 51. Bannister, L.H.; Mitchell, G.H.; Butcher, G.A.; Dennis, E.D. Lamellar membranes  
829 associated with rhoptries in erythrocytic merozoites of *Plasmodium knowlesi*: a clue  
830 to the mechanism of invasion. *Parasitology* **1986**, *92*, 291-303,  
831 doi:10.1017/S0031182000064064.
- 832 52. Liffner, B.; Balbin, J.M.; Wichers, J.S.; Gilberger, T.-W.; Wilson, D.W. The Ins and  
833 Outs of *Plasmodium* Rhoptries, Focusing on the Cytosolic Side. *Trends in*  
834 *Parasitology* **2021**, *37*, 638-650, doi:10.1016/j.pt.2021.03.006.
- 835 53. Sakwe, A.M.; Nguyen, T.; Athanasopoulos, V.; Shire, K.; Frappier, L. Identification  
836 and characterization of a novel component of the human minichromosome  
837 maintenance complex. *Mol Cell Biol* **2007**, *27*, 3044-3055, doi:10.1128/mcb.02384-  
838 06.
- 839 54. Nishiyama, A.; Frappier, L.; Méchali, M. MCM-BP regulates unloading of the  
840 MCM2-7 helicase in late S phase. *Genes Dev* **2011**, *25*, 165-175,  
841 doi:10.1101/gad.614411.
- 842 55. Takahashi, N.; Quimbaya, M.; Schubert, V.; Lammens, T.; Vandepoele, K.; Schubert,  
843 I.; Matsui, M.; Inzé, D.; Berx, G.; De Veylder, L. The MCM-binding protein ETG1  
844 aids sister chromatid cohesion required for postreplicative homologous recombination  
845 repair. *PLoS Genet* **2010**, *6*, e1000817, doi:10.1371/journal.pgen.1000817.
- 846 56. Stray, J.E.; Lindsley, J.E. Biochemical analysis of the yeast condensin Smc2/4  
847 complex: an ATPase that promotes knotting of circular DNA. *J Biol Chem* **2003**, *278*,  
848 26238-26248, doi:10.1074/jbc.M302699200.
- 849 57. Wang, H.; Liu, Y.; Yuan, J.; Zhang, J.; Han, F. The condensin subunits SMC2 and  
850 SMC4 interact for correct condensation and segregation of mitotic maize  
851 chromosomes. *Plant J* **2020**, *102*, 467-479, doi:10.1111/tpj.14639.
- 852 58. Pandey, R.; Abel, S.; Boucher, M.; Wall, R.J.; Zeeshan, M.; Rea, E.; Freville, A.; Lu,  
853 X.M.; Brady, D.; Daniel, E.; et al. *Plasmodium* Condensin Core Subunits  
854 SMC2/SMC4 Mediate Atypical Mitosis and Are Essential for Parasite Proliferation

- 855 and Transmission. *Cell Reports* **2020**, *30*, 1883-1897.e1886,  
856 doi:<https://doi.org/10.1016/j.celrep.2020.01.033>.
- 857 59. Strunnikov, A.V.; Hogan, E.; Koshland, D. SMC2, a *Saccharomyces cerevisiae* gene  
858 essential for chromosome segregation and condensation, defines a subgroup within  
859 the SMC family. *Genes & Development* **1995**, *9*, 587-599, doi:10.1101/gad.9.5.587.
- 860 60. Steffensen, S.; Coelho, P.A.; Cobbe, N.; Vass, S.; Costa, M.; Hassan, B.; Prokopenko,  
861 S.N.; Bellen, H.; Heck, M.M.S.; Sunkel, C.E. A role for *Drosophila* SMC4 in the  
862 resolution of sister chromatids in mitosis. *Current Biology* **2001**, *11*, 295-307,  
863 doi:10.1016/S0960-9822(01)00096-3.
- 864 61. Hong, Y.; Sonnevile, R.; Wang, B.; Scheidt, V.; Meier, B.; Woglar, A.; Demetriou,  
865 S.; Labib, K.; Jantsch, V.; Gartner, A. LEM-3 is a midbody-tethered DNA nuclease  
866 that resolves chromatin bridges during late mitosis. *Nature Communications* **2018**, *9*,  
867 728, doi:10.1038/s41467-018-03135-w.
- 868 62. Zhang, M.; Wang, C.; Otto, T.D.; Oberstaller, J.; Liao, X.; Adapa, S.R.; Udenze, K.;  
869 Bronner, I.F.; Casandra, D.; Mayho, M.; et al. Uncovering the essential genes of the  
870 human malaria parasite *Plasmodium falciparum* by saturation mutagenesis. *Science*  
871 **2018**, *360*, eaap7847, doi:doi:10.1126/science.aap7847.
- 872 63. Bushell, E.; Gomes, A.R.; Sanderson, T.; Anar, B.; Girling, G.; Herd, C.; Metcalf, T.;  
873 Modrzynska, K.; Schwach, F.; Martin, R.E.; et al. Functional Profiling of a  
874 *Plasmodium* Genome Reveals an Abundance of Essential Genes. *Cell* **2017**, *170*, 260-  
875 272.e268, doi:10.1016/j.cell.2017.06.030.
- 876 64. Canning, E.U.; Sinden, R.E. The organization of the ookinete and observations on  
877 nuclear division in oocysts of *Plasmodium berghei*. *Parasitology* **1973**, *67*, 29-40,  
878 doi:10.1017/S0031182000046266.
- 879
- 880
